# Supplementary material for: Substituent effect of group 14 elements on the ring-opening reaction of cyclobutene
Source: Royal Society of Chemistry journal article supplement (doi:10.1039/c004972g), 2010-01-01

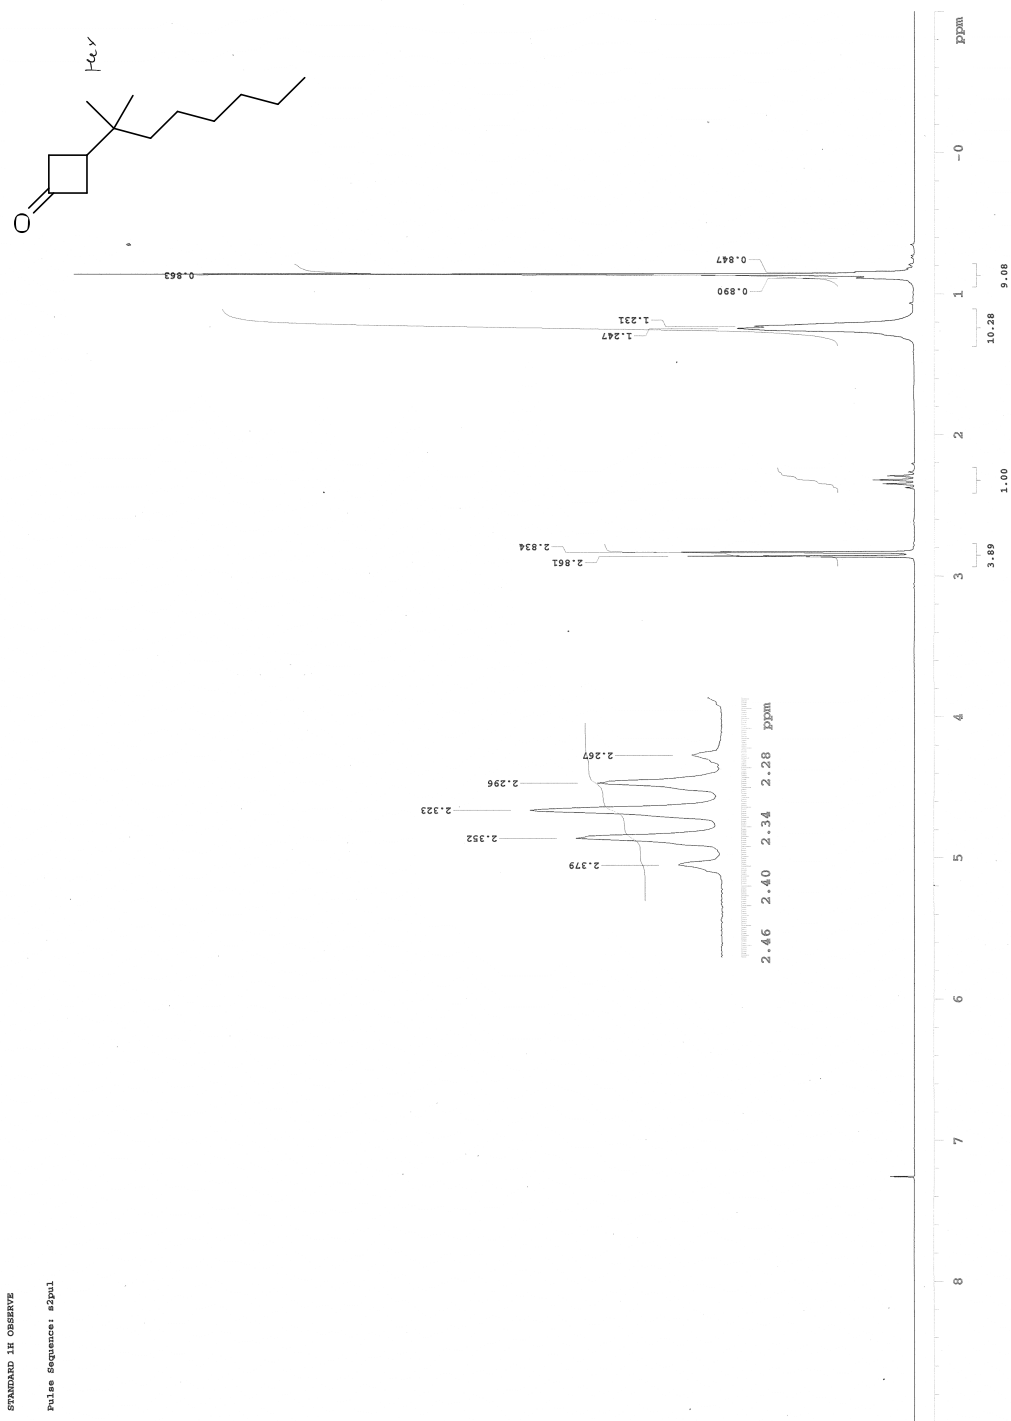

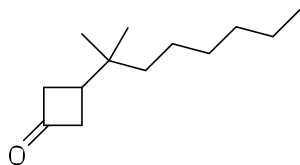

13C OBSERVE

Pulse Sequence: zgpg30

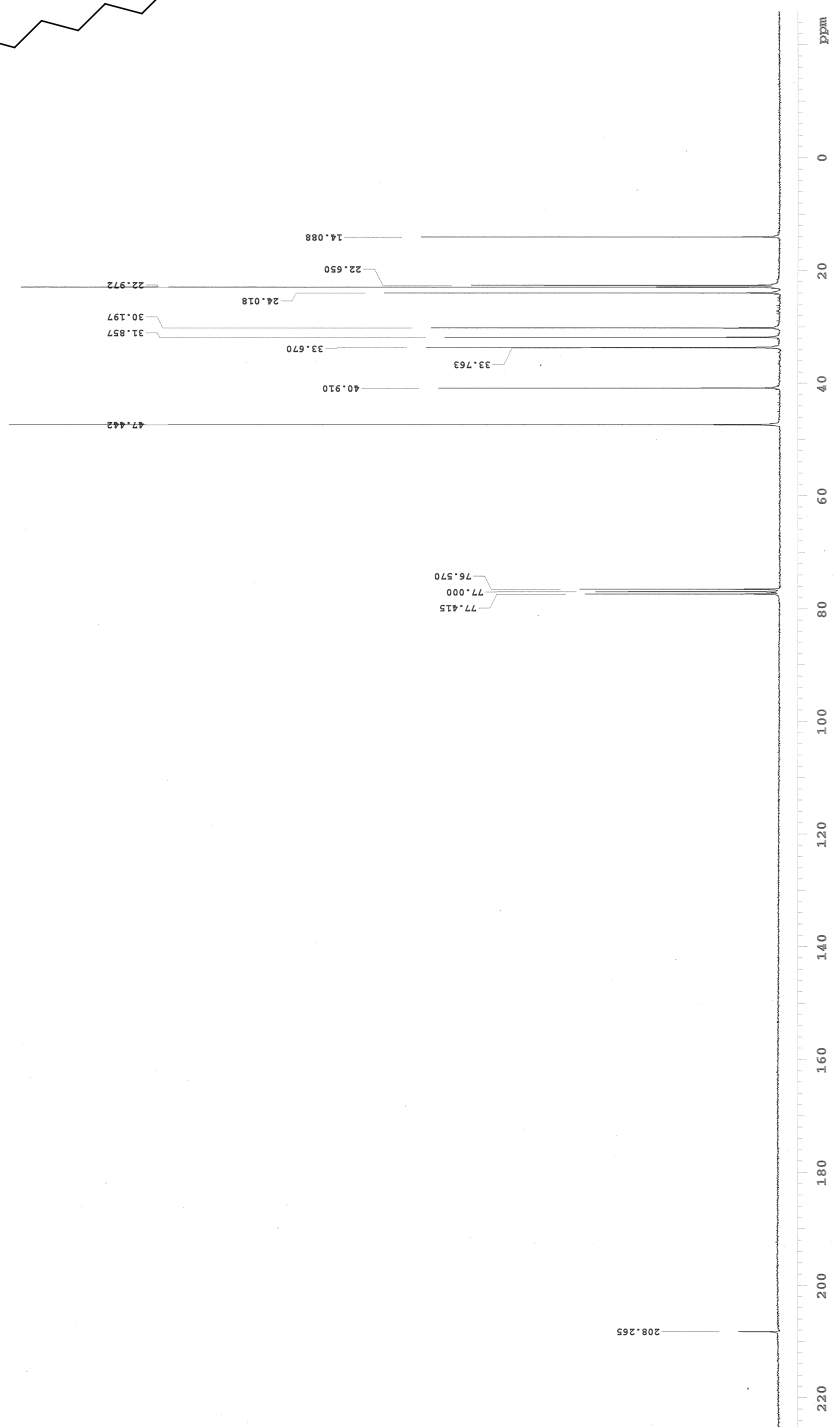

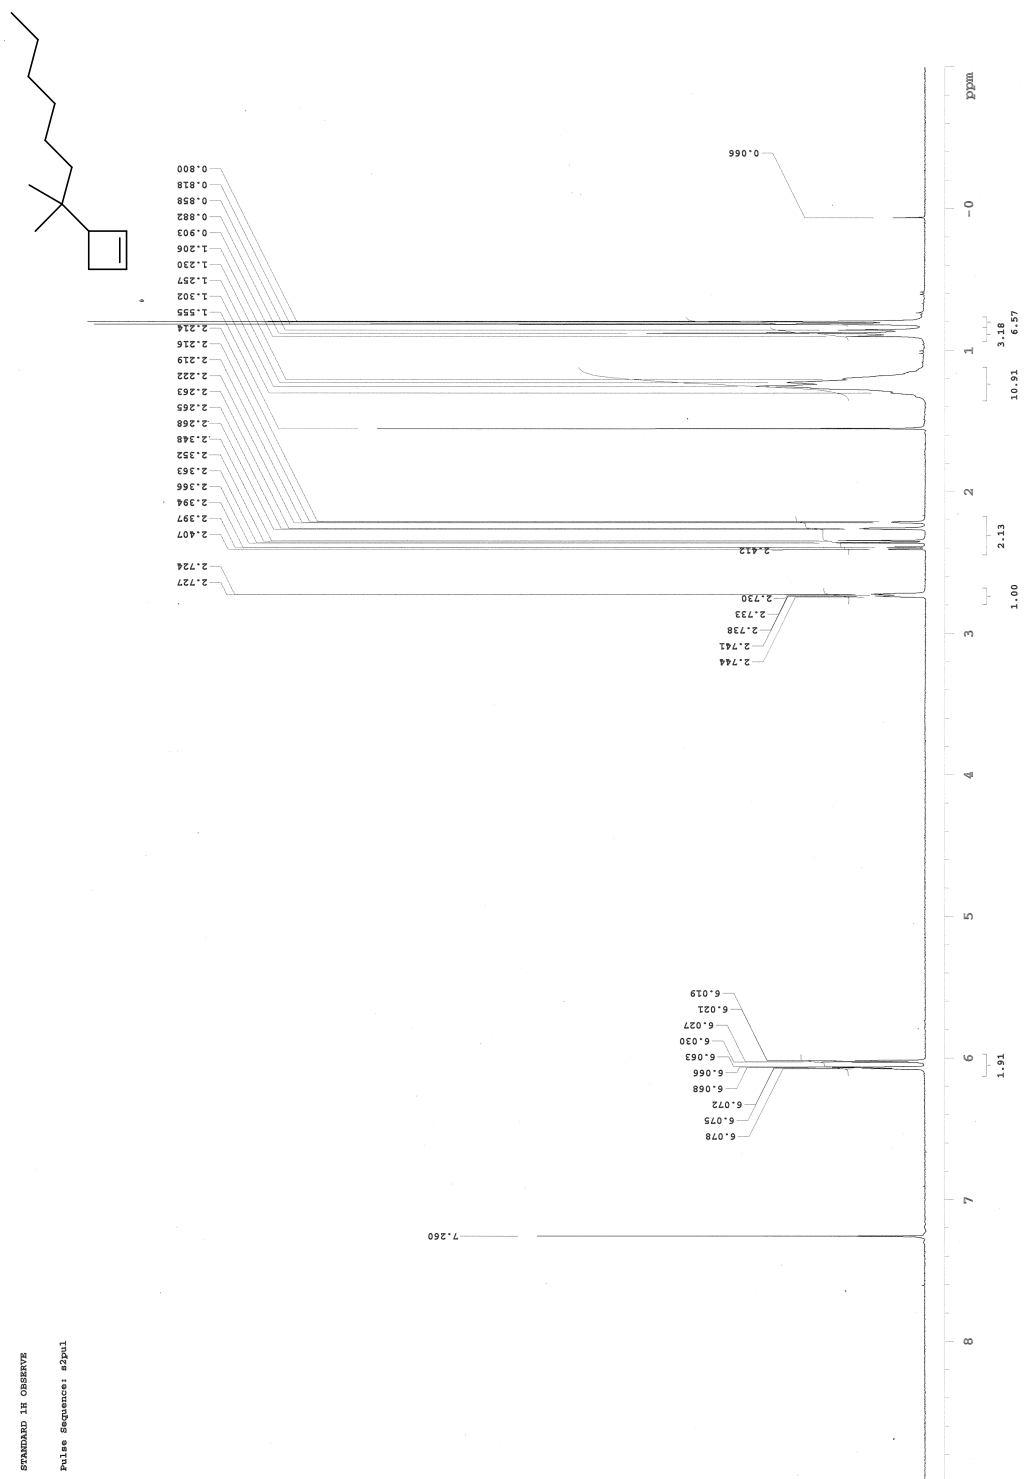

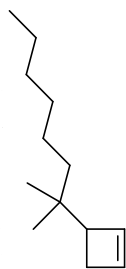

1JC OBSERVEF

Pulse Sequence: #2pul

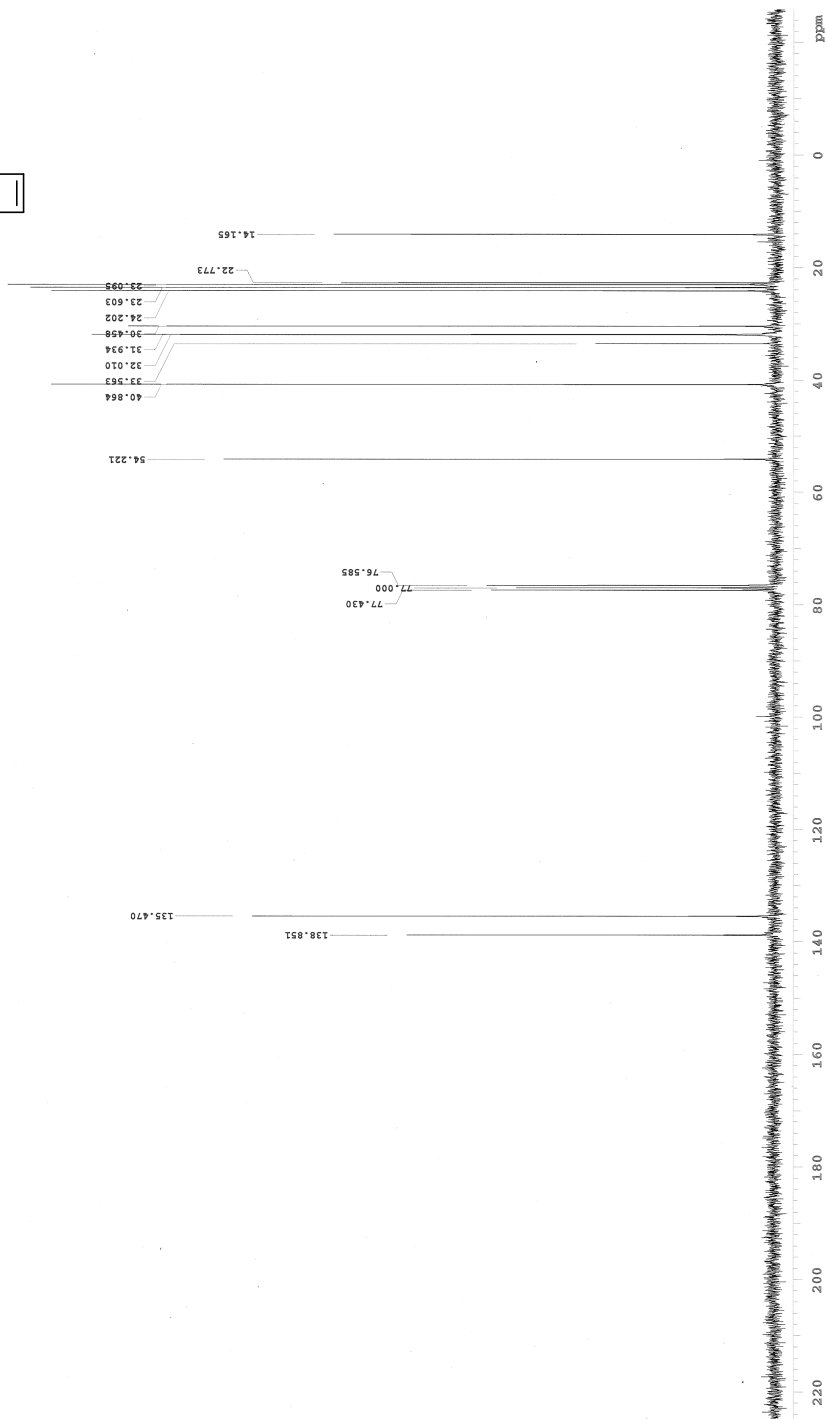

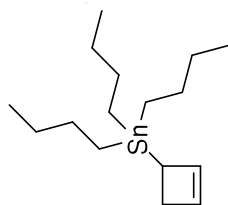

STANDARD IN OBSERVE

Pulse sequence: zgpg30

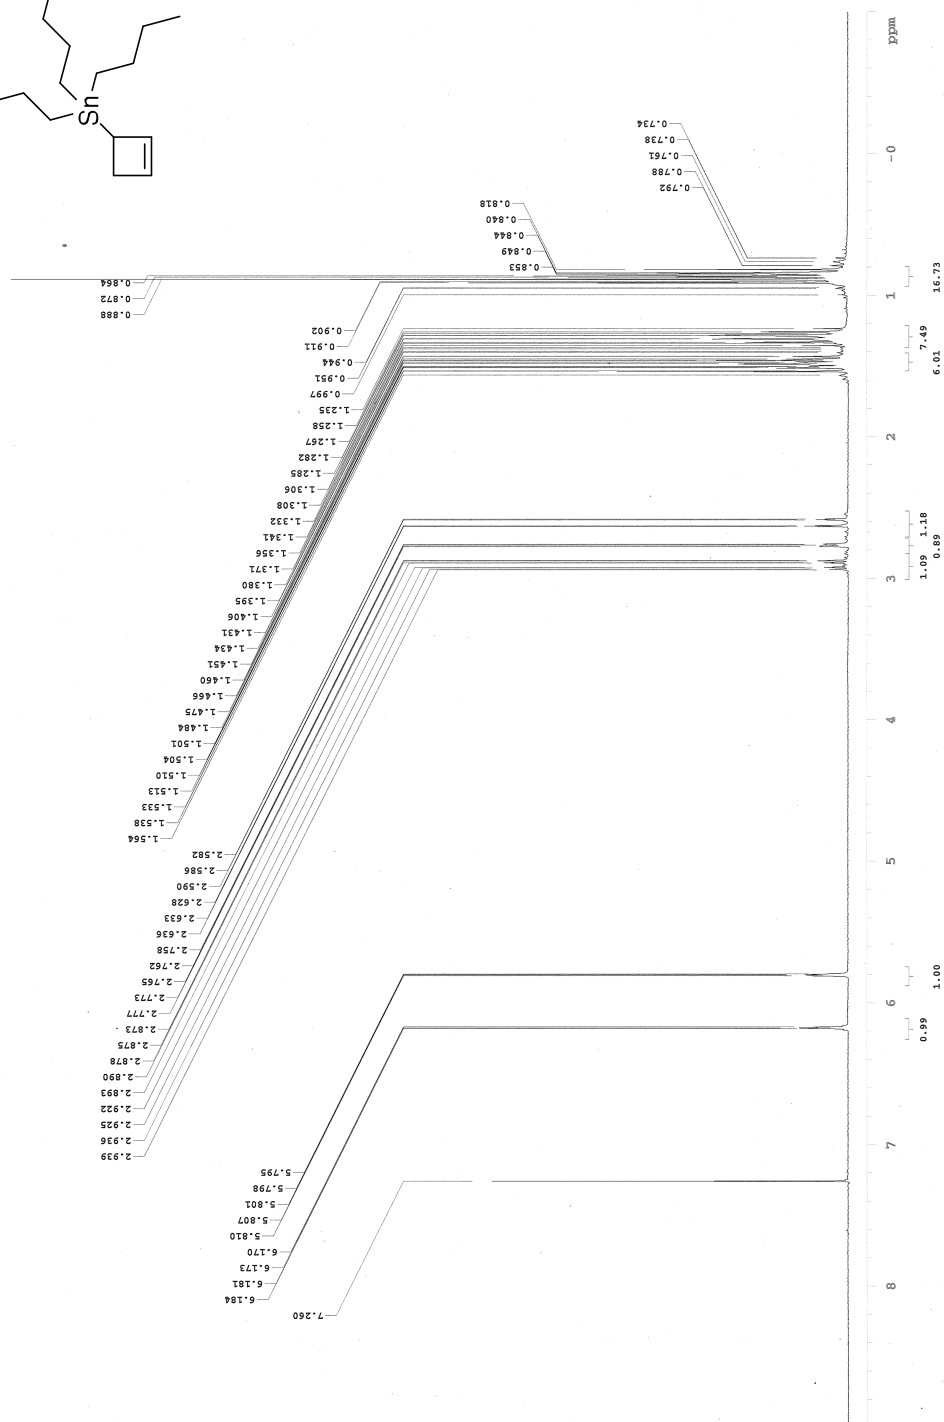

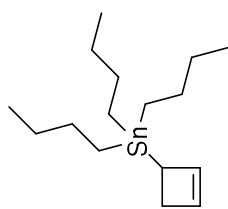

13C OBSERVE  
Pulse Sequence: zgpg30

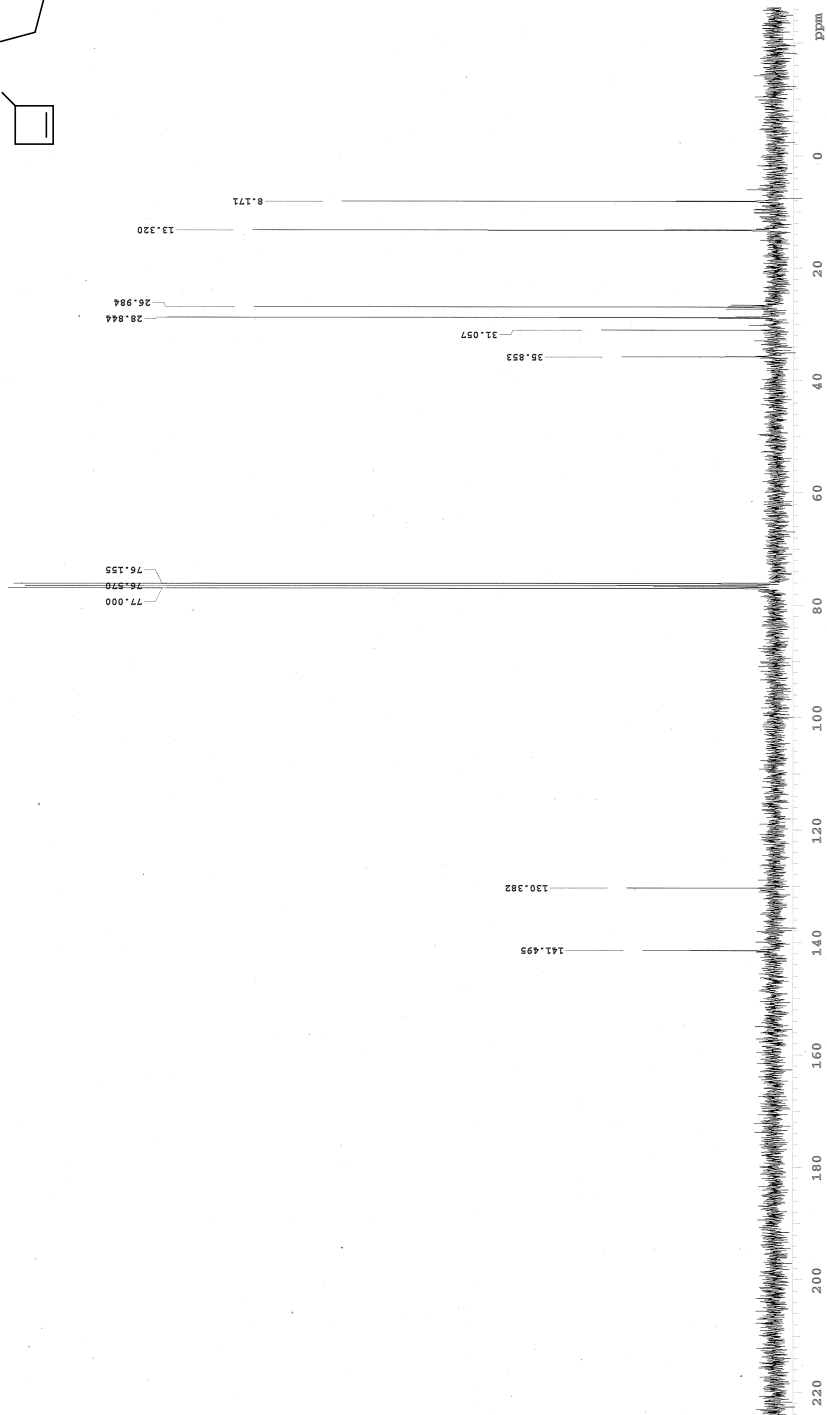

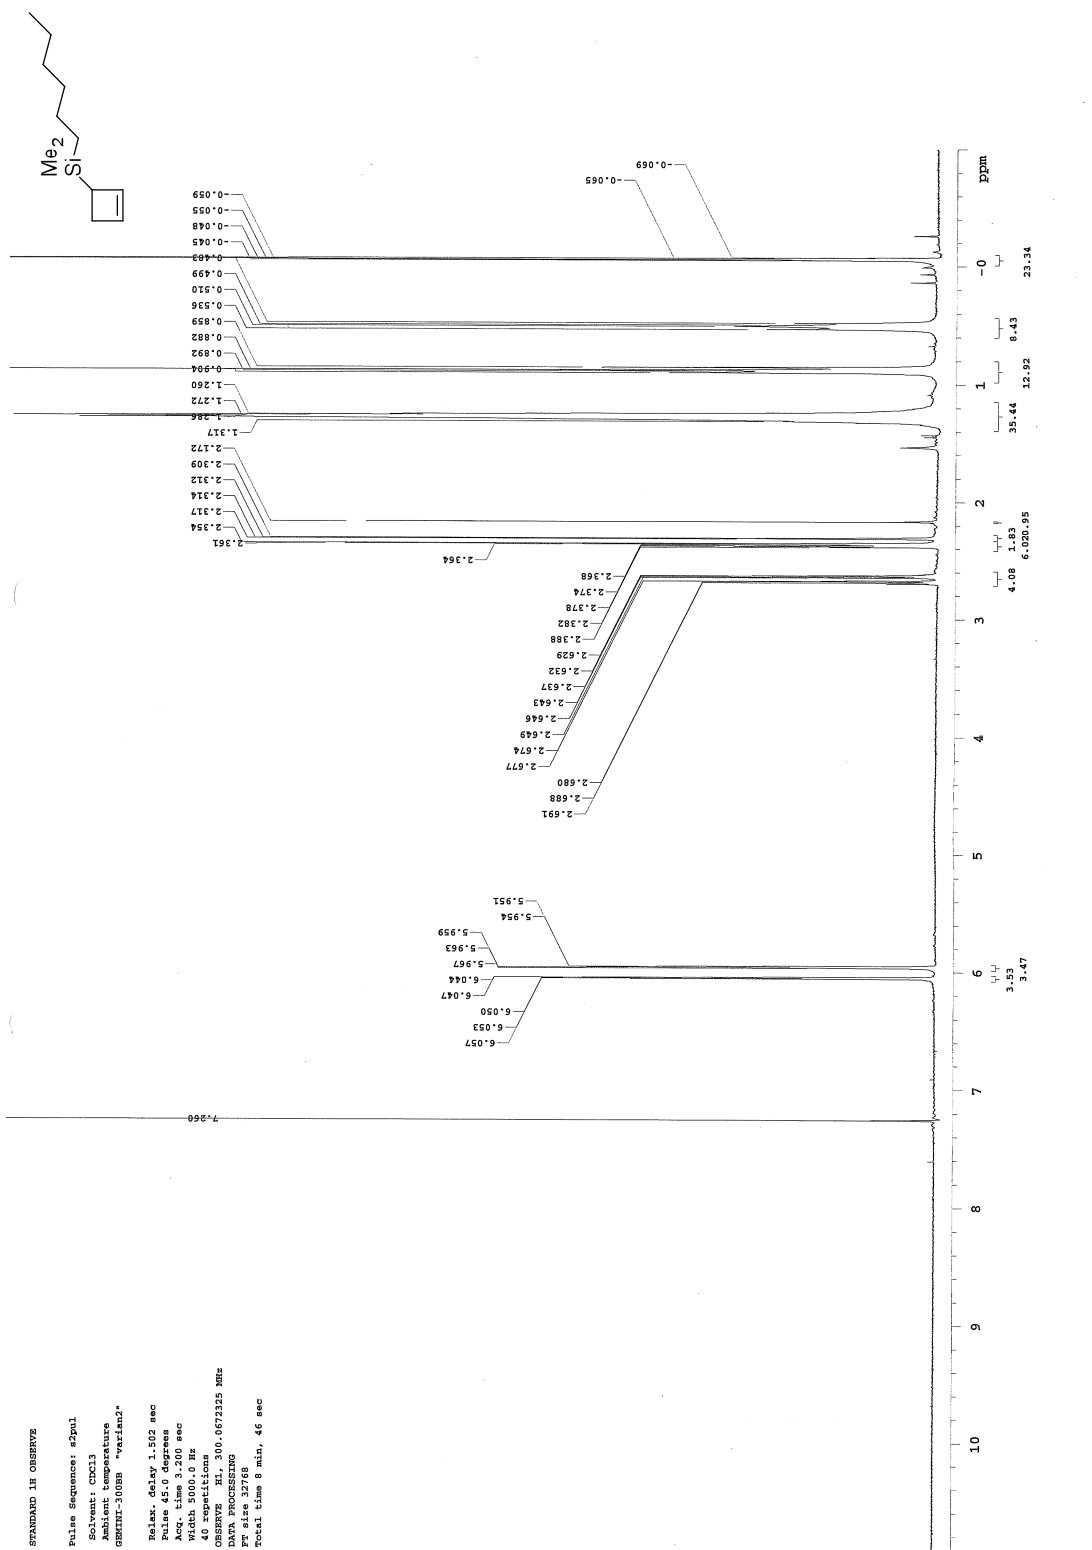

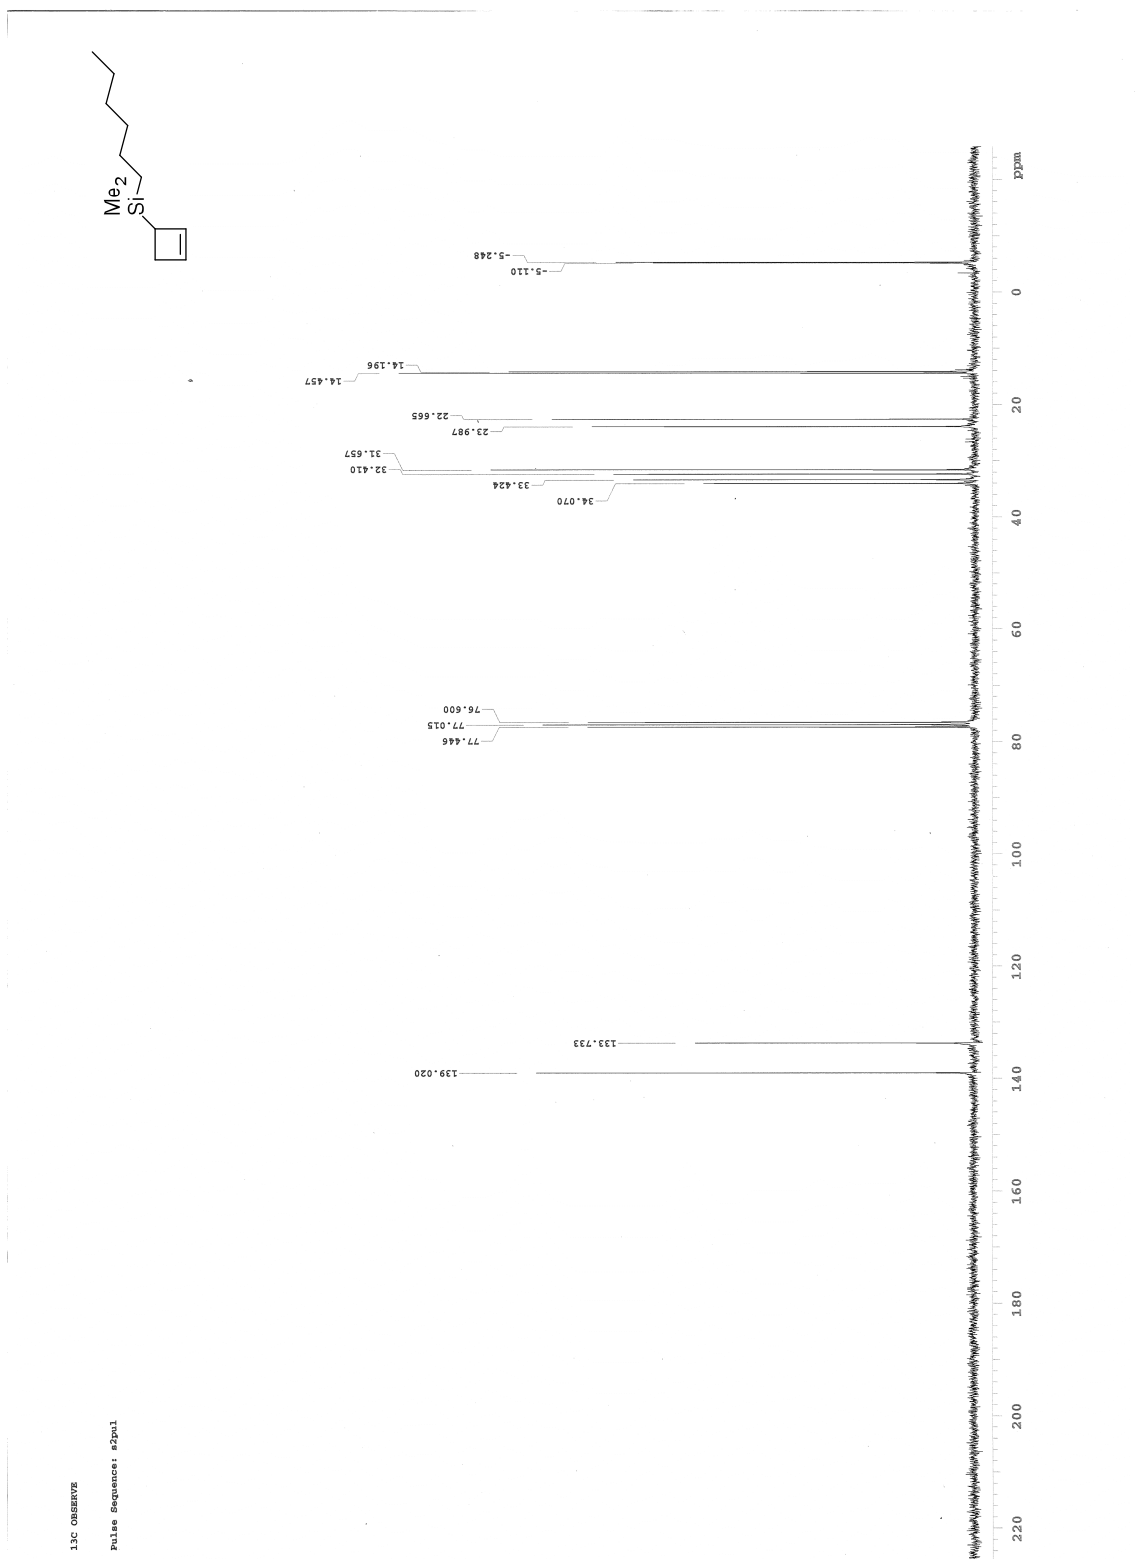



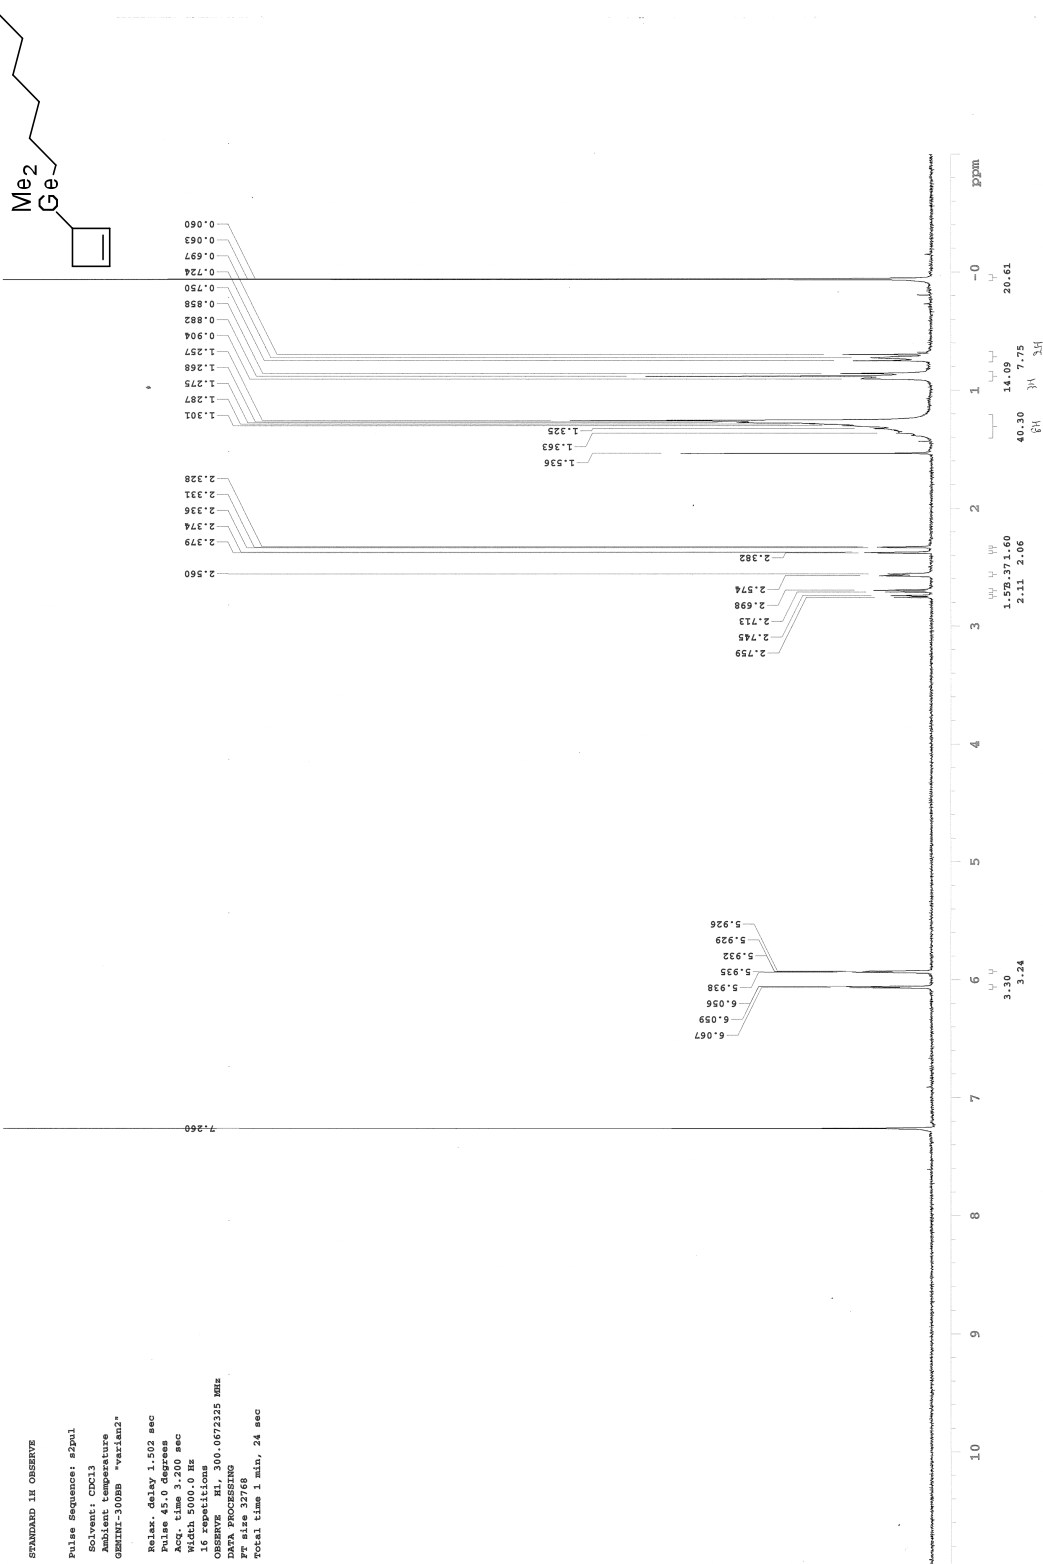

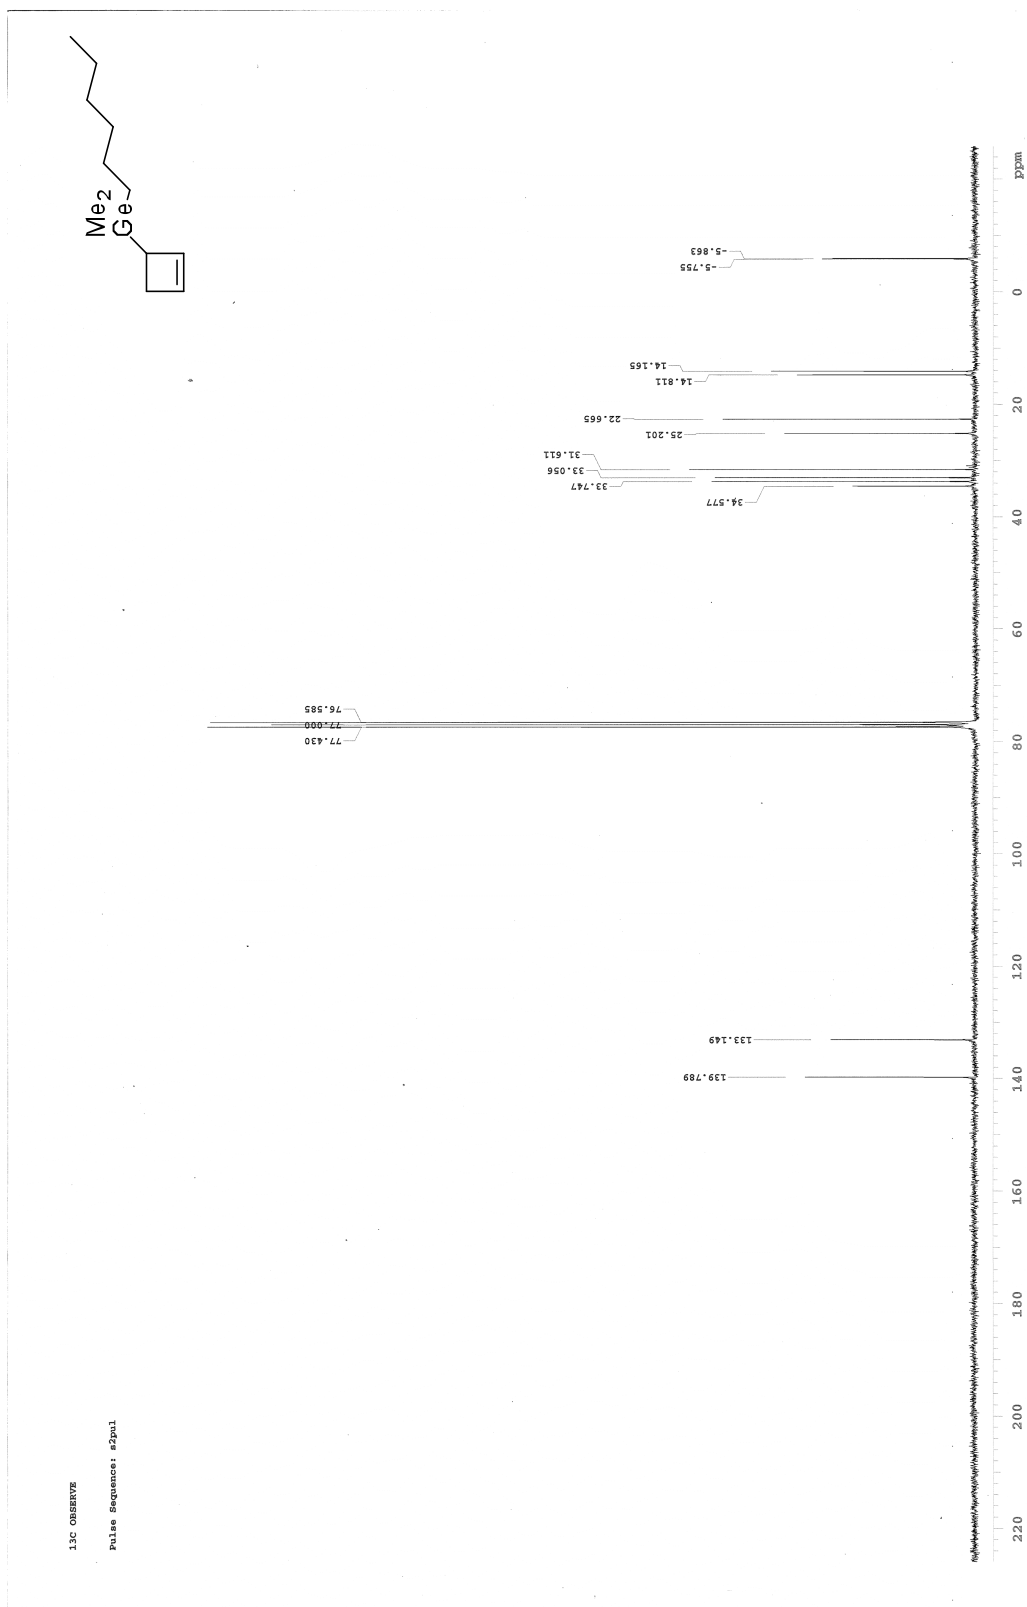

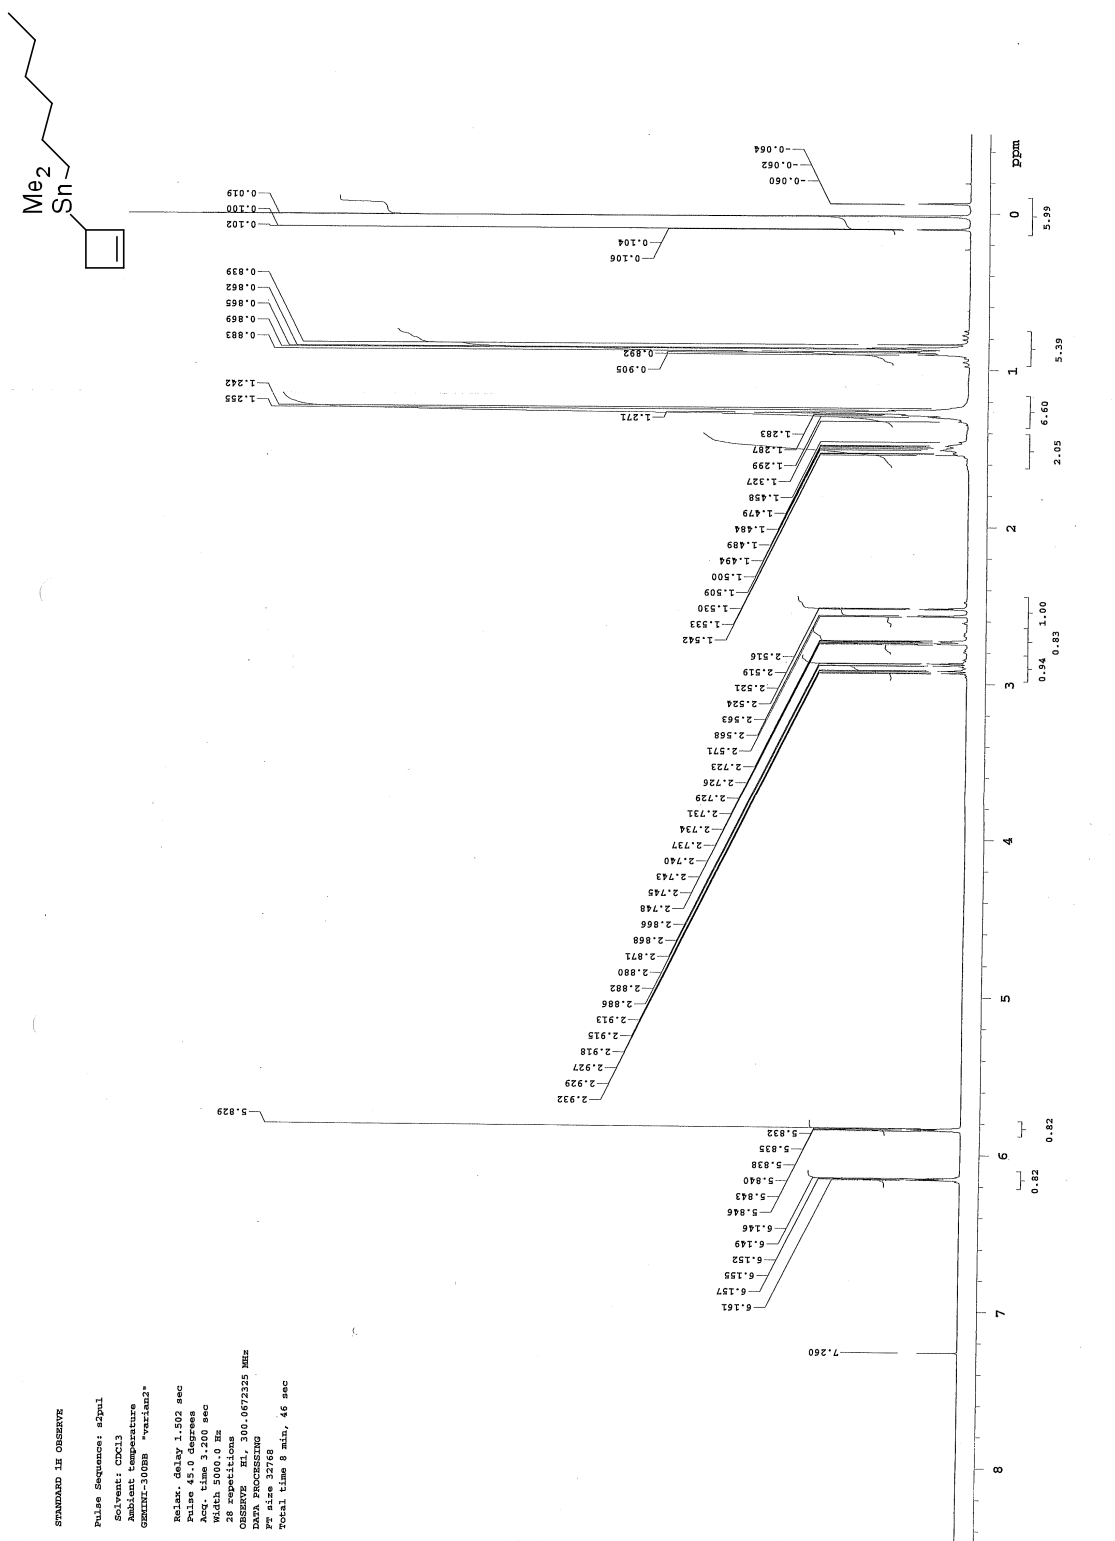

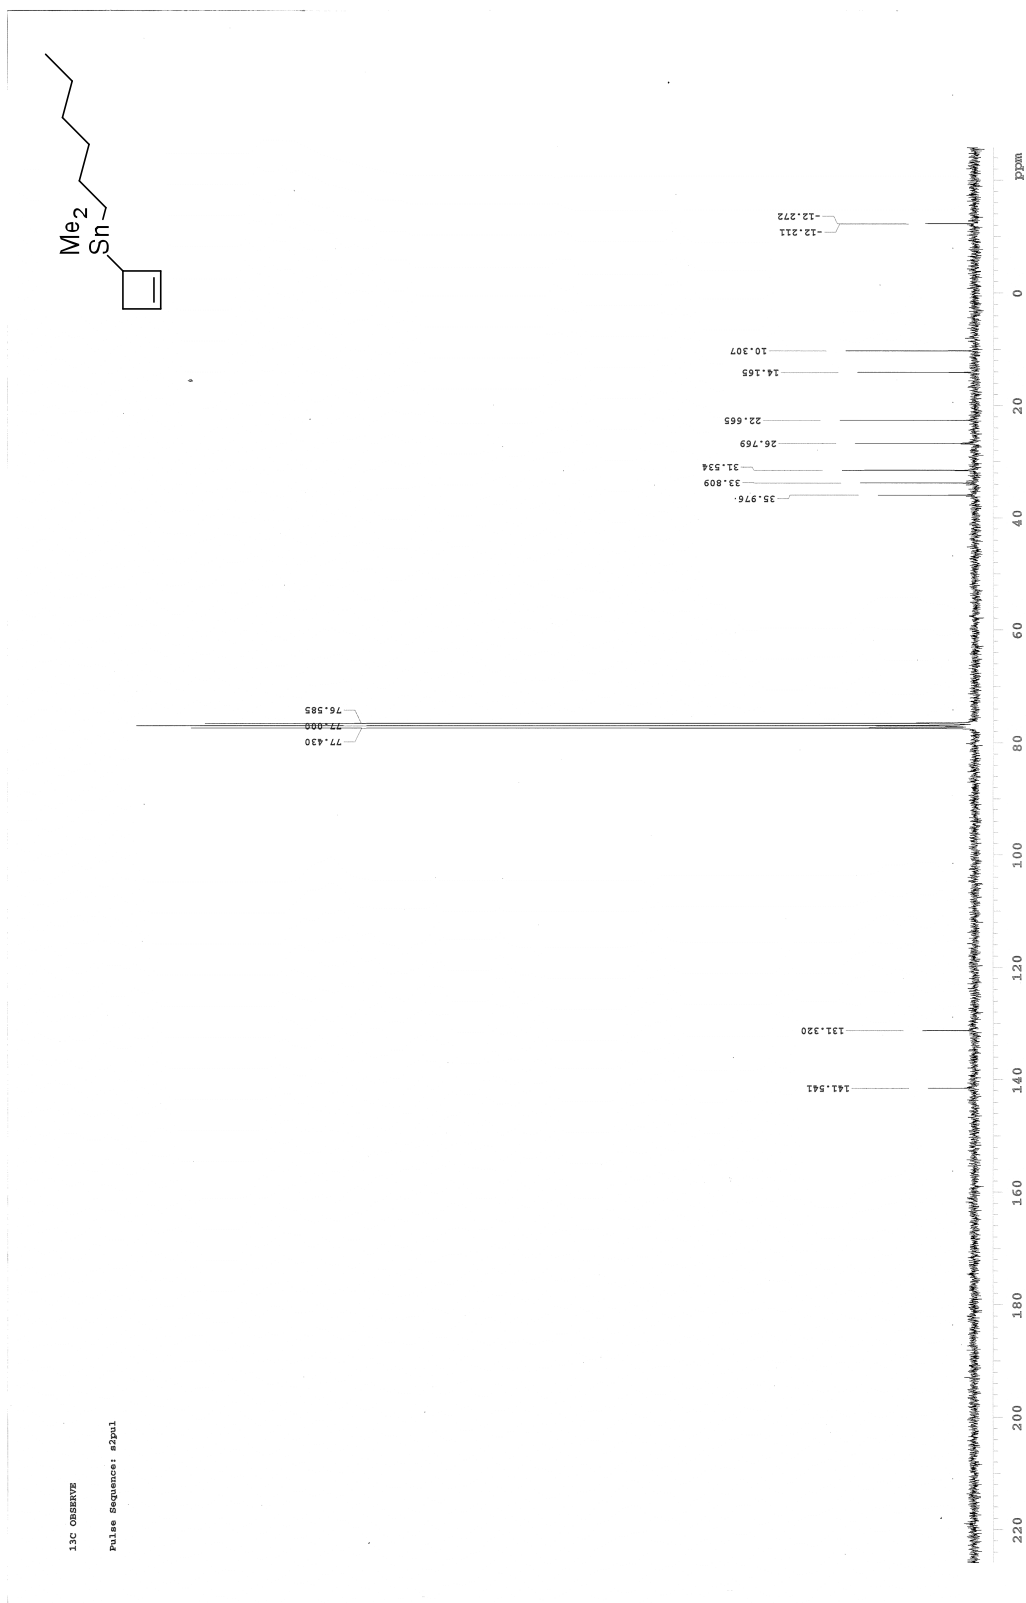

diene-CheZtrex  
Pulse sequence: zgpg1

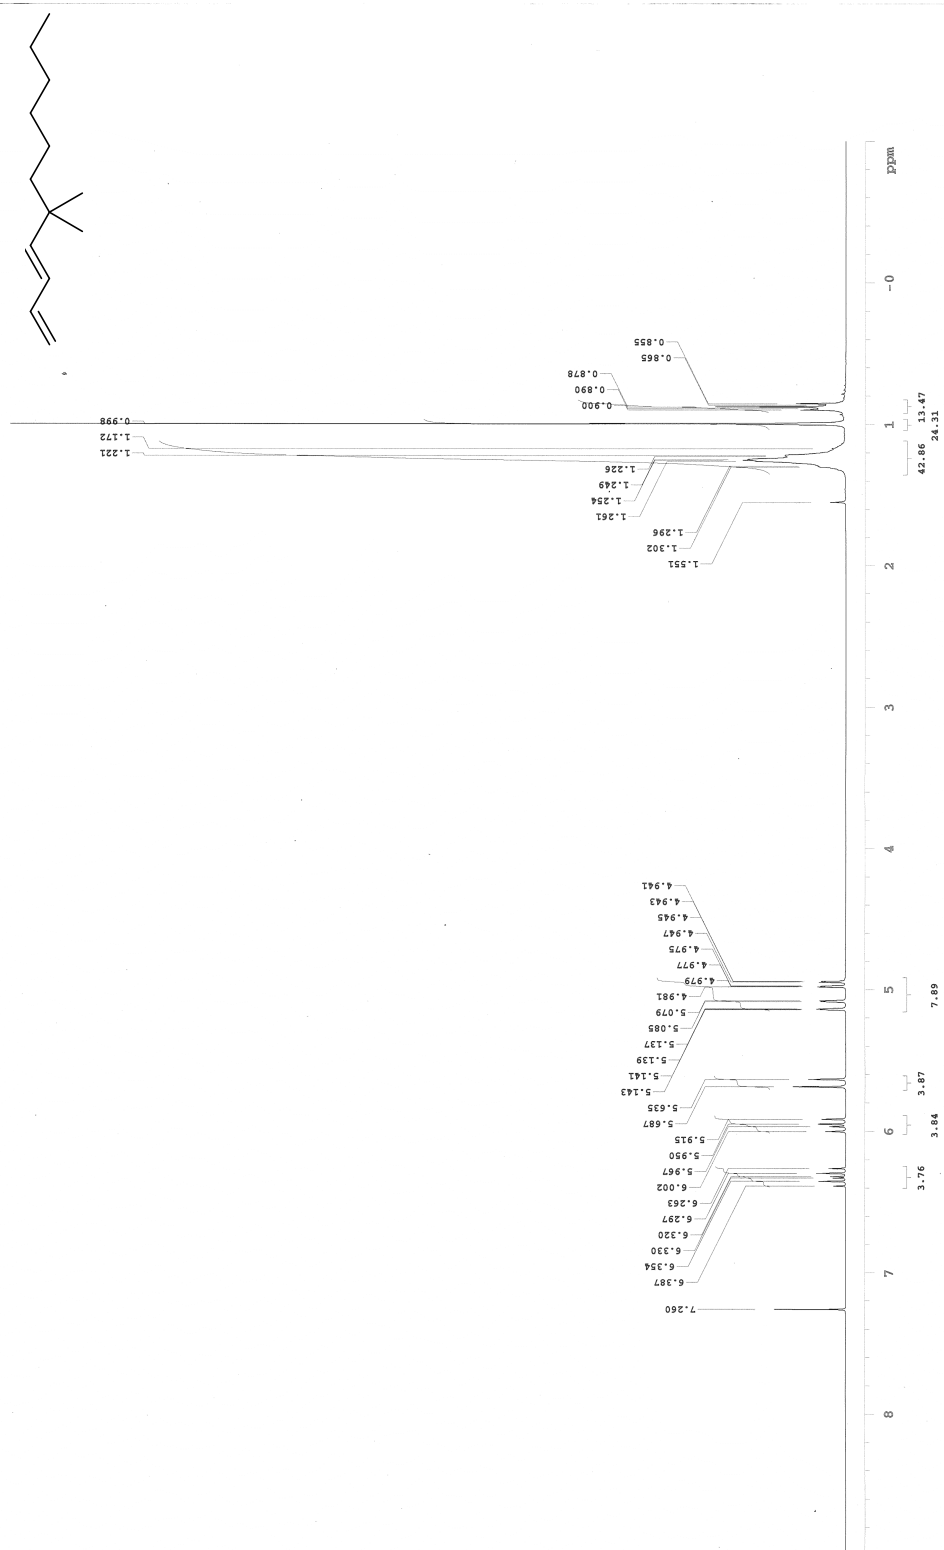

13C OBSERVE

Pulse sequence: zgpg1

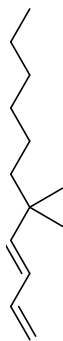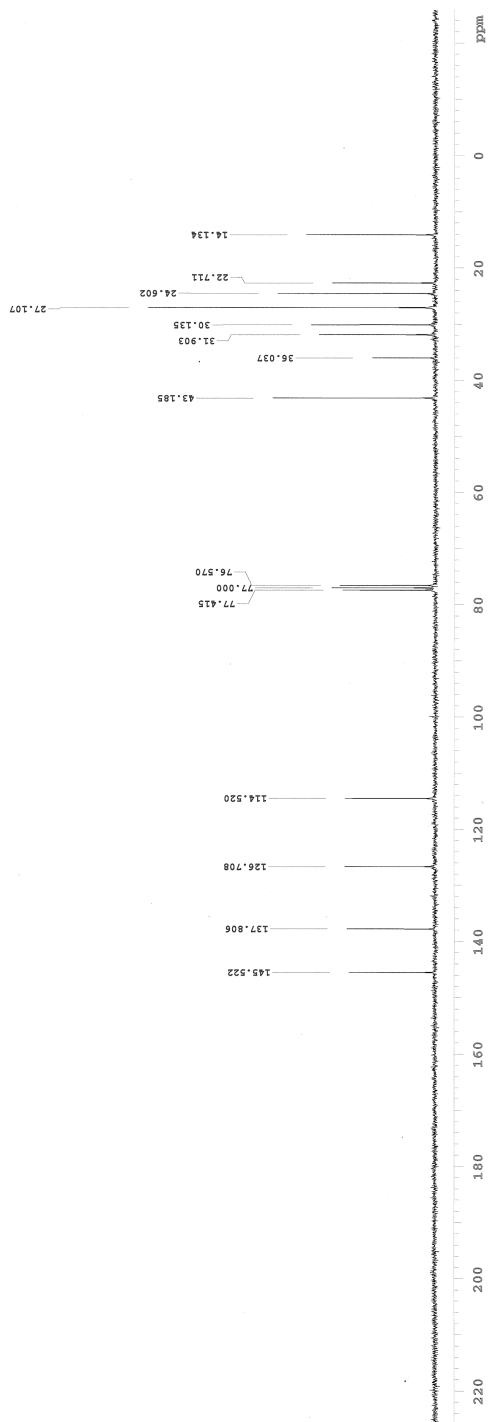

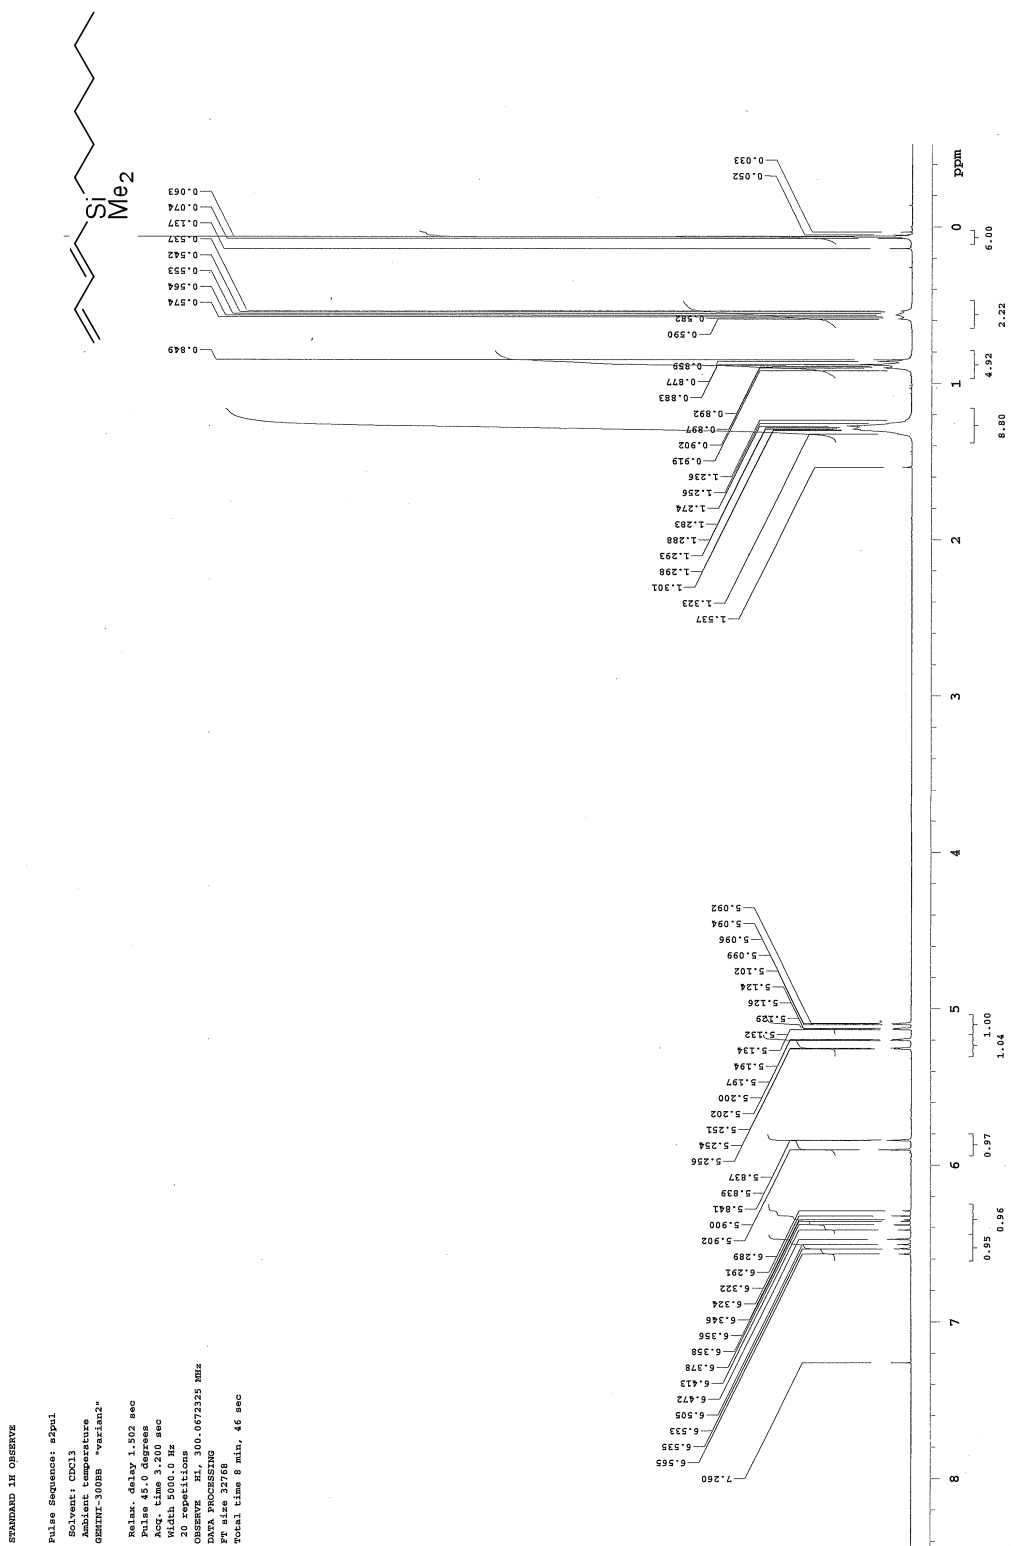

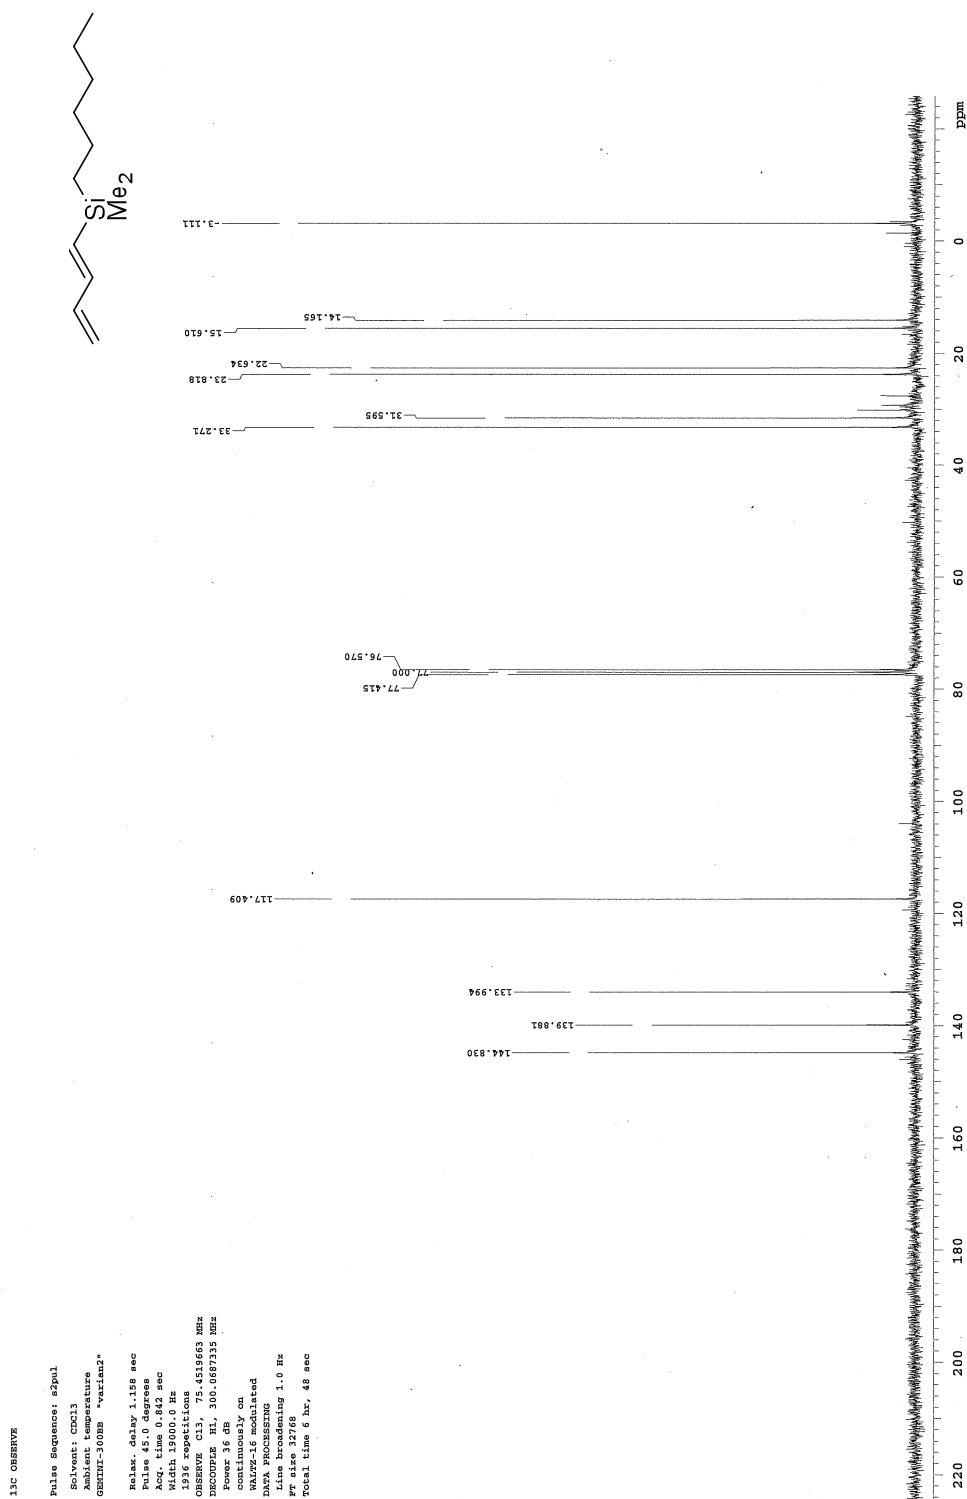



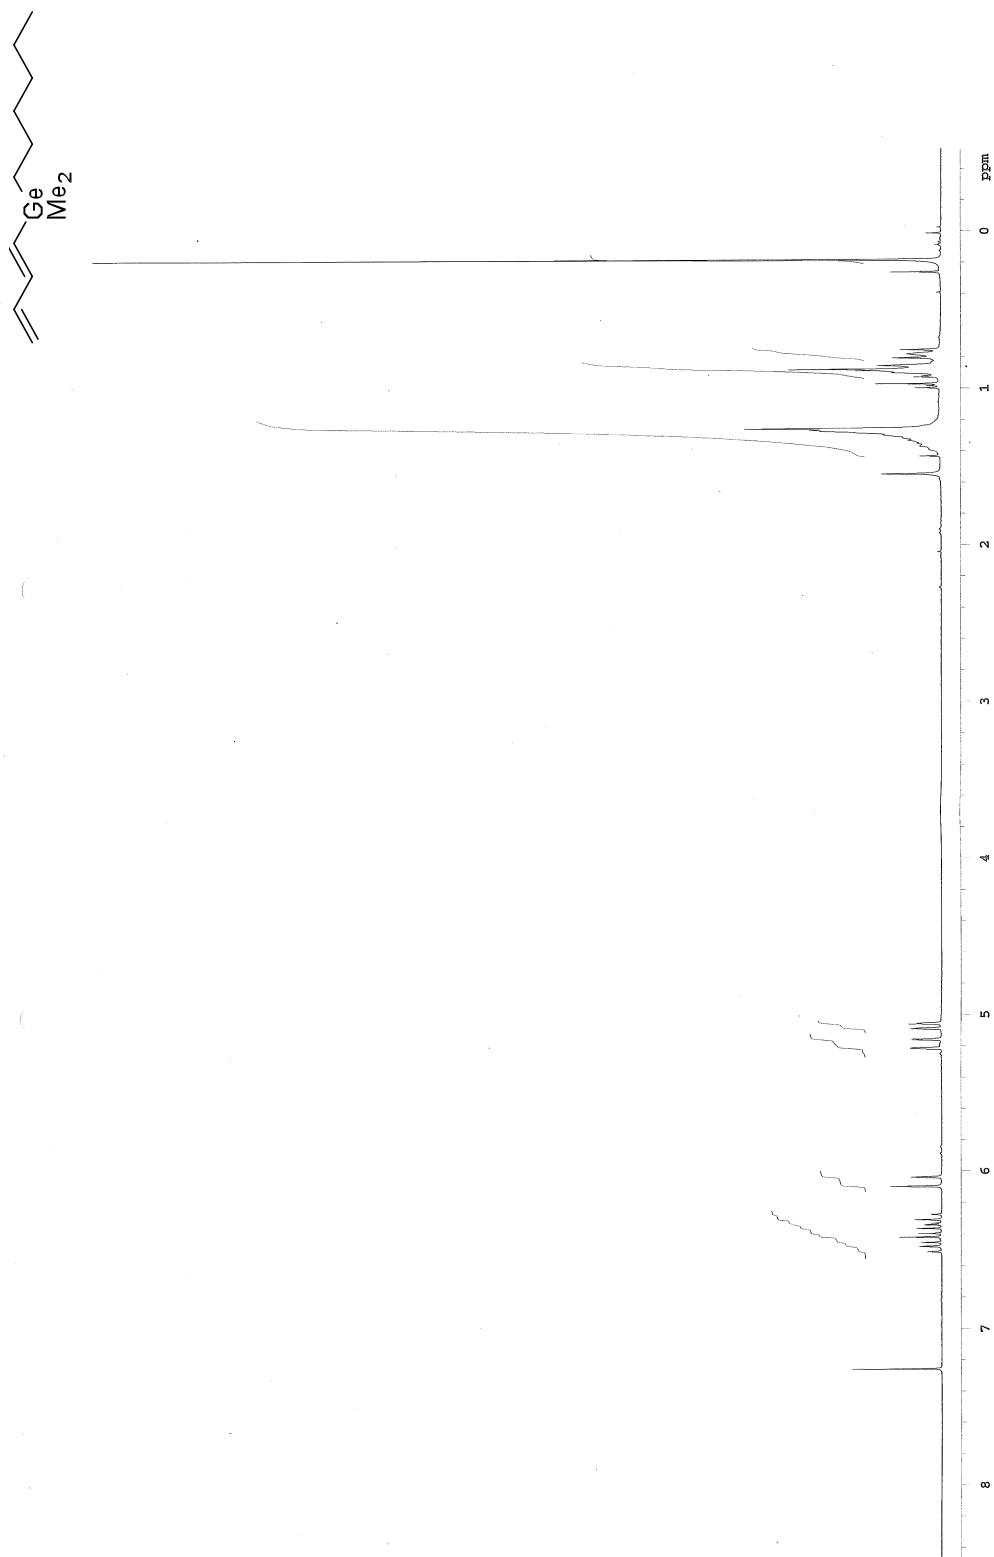

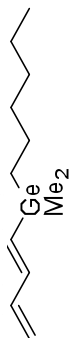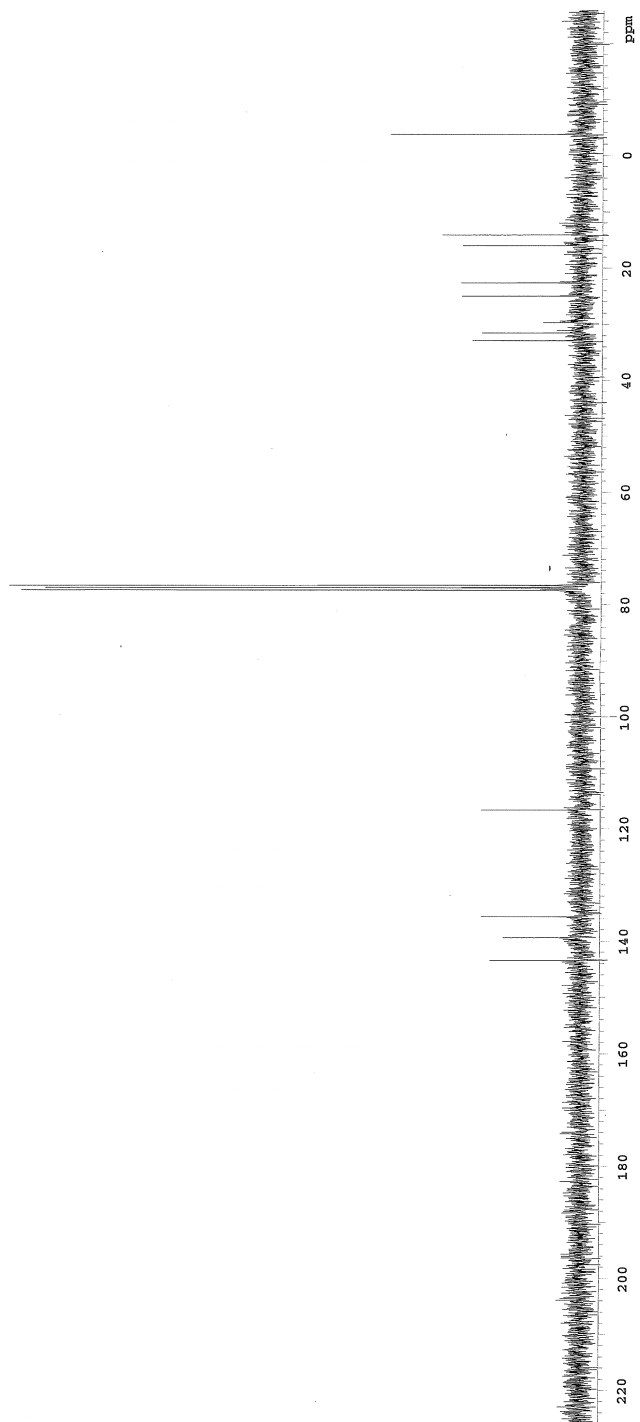

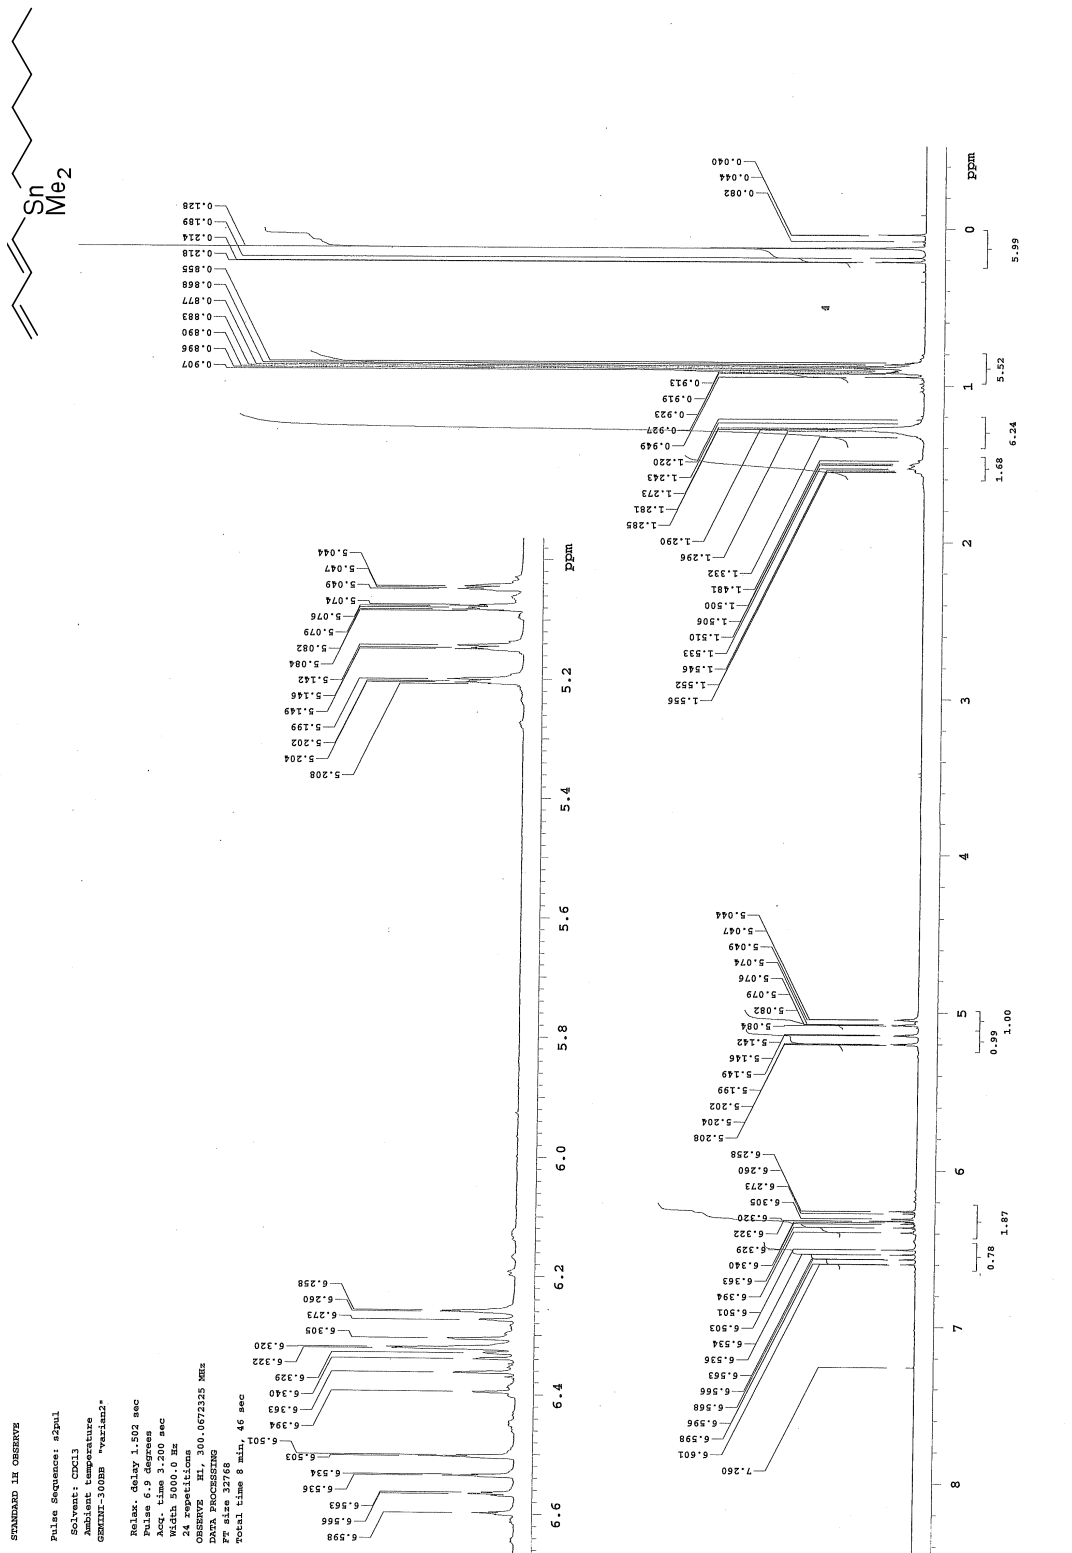

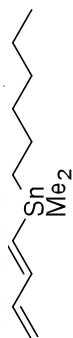

13C OBSERVE

Pulse Sequence: sDpul

Solvent: CDCl3

Ambient temperature

GBMT-300B "variaz"

Relax. delay 1.128 sec

Pulse 45.0 degrees

Acq. time 1.24 sec

Width 19000.0 Hz

2080 repetitions

OBSERVE C13, 75.4519663 MHz

RECORD IN, 300.0687235 MHz

conv. 81.0

conv. 81.0

WALTZ-16 modulated

DATA PROCESSING

Line broadening 1.0 Hz

FT size 32768

Total time 60 hr, 8 min, 7 sec

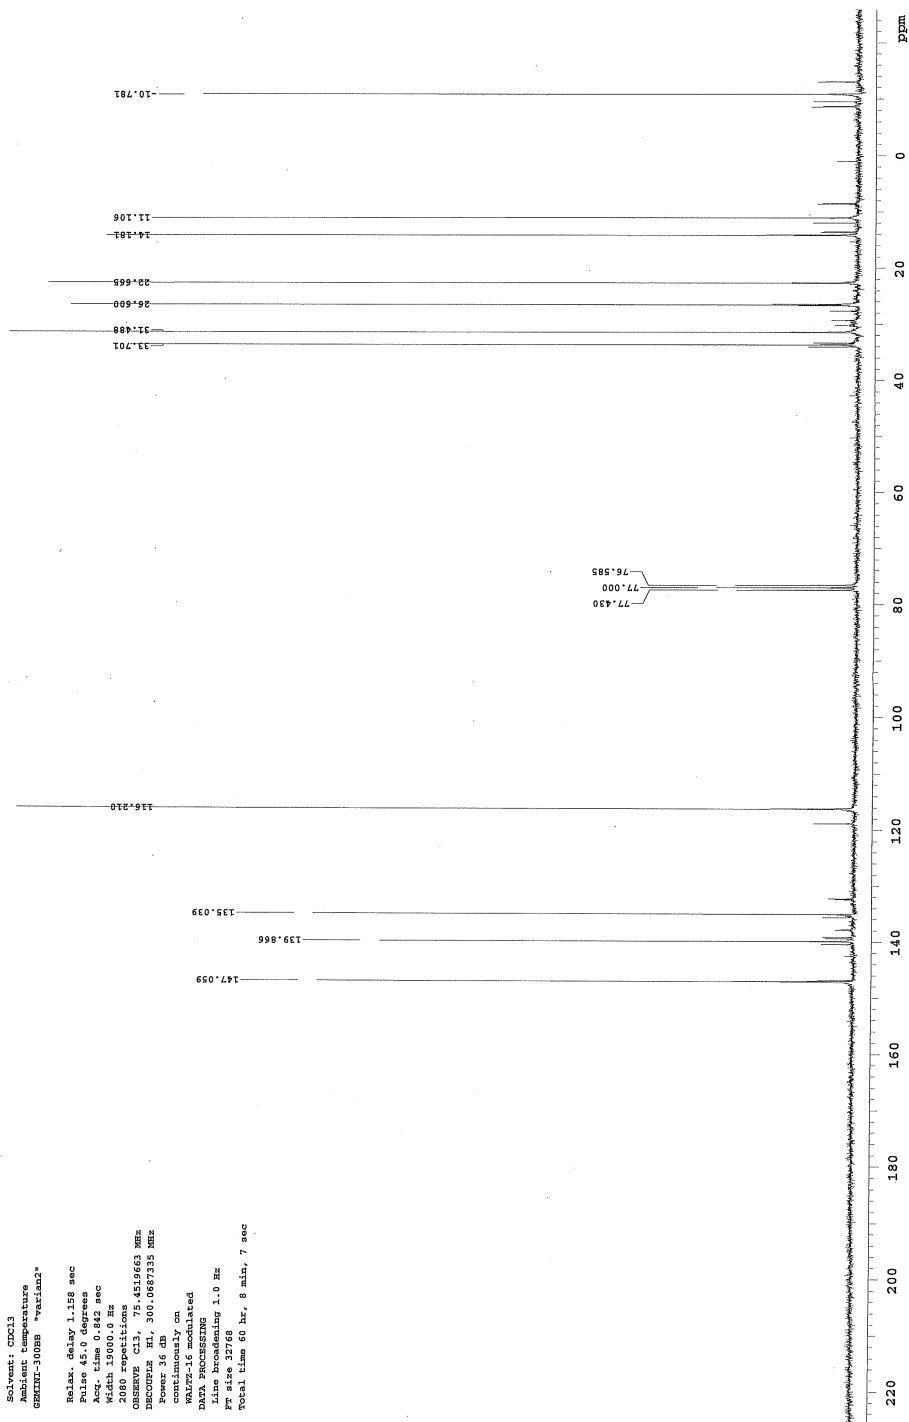

Supplement: c004972g-a.pdf [file c004972g-a.pdf]
