# Supplementary material for: Substituent effect of group 14 elements on the ring-opening reaction of cyclobutene
Source: Royal Society of Chemistry journal article supplement (doi:10.1039/c004972g), 2010-01-01
Supplement: c004972g-b.pdf [file c004972g-b.pdf]

**Substituent Effect of Group 14 Elements on the Ring-Opening Reaction of  
Cyclobutene**

Munehiro Hasegawa, Ippei Usui, Soichiro Konno and Masahiro Murakami.

*Department of Synthetic Chemistry and Biological Chemistry, Kyoto University,  
Katsura, Kyoto 615-8510, Japan*

### Ring-Opening Reaction of 3

| Time<br>(h) | Conversion<br>(%) | $\ln(100/(100-\text{conv.}))$ | Ratio (Z/E) |     |
|-------------|-------------------|-------------------------------|-------------|-----|
|             |                   |                               | Z           | E   |
| 0           | 0.0               | 0                             | 0           | 100 |
| 0.25        | 25.4              | 0.2926                        | 0           | 100 |
| 0.5         | 43.6              | 0.5726                        | 0           | 100 |
| 0.75        | 57.1              | 0.8467                        | 0           | 100 |
| 1           | 67.0              | 1.1084                        | 0           | 100 |
| 2           | 90.5              | 2.3507                        | 0           | 100 |

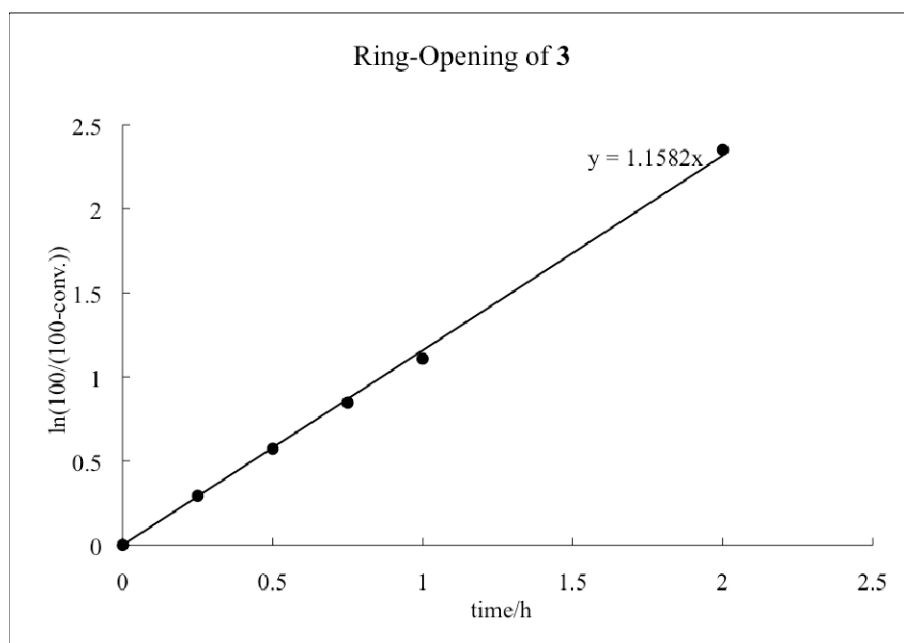

### Ring-Opening Reaction of 7

| Time<br>(h) | Conversion<br>(%) | $\ln(100/(100-\text{conv.}))$ | Ratio (Z/E) |      |
|-------------|-------------------|-------------------------------|-------------|------|
|             |                   |                               | Z           | E    |
| 0           | 0.0               | 0                             |             |      |
| 0.5         | 36.0              | 0.4457                        | 76.5        | 23.5 |
| 1           | 59.2              | 0.8955                        | 76.5        | 23.5 |
| 1.5         | 73.8              | 1.3408                        | 75.6        | 24.4 |
| 2           | 82.5              | 1.7413                        | 75.5        | 24.5 |
| 3           | 92.3              | 2.5664                        | 75.7        | 24.3 |

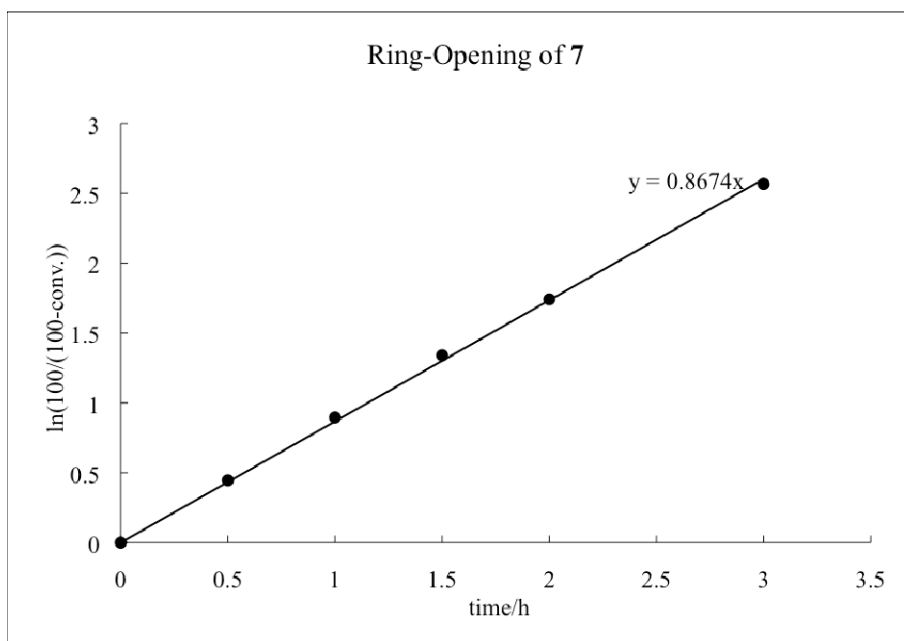

## Ring-Opening Reaction of **8**

| Time<br>(h) | Conversion<br>(%) | $\ln(100/(100-\text{conv.}))$ | Ratio (Z/E) |      |
|-------------|-------------------|-------------------------------|-------------|------|
|             |                   |                               | Z           | E    |
| 0           | 0.0               | 0                             |             |      |
| 1           | 18.7              | 0.2069                        | 46.5        | 53.5 |
| 2           | 34.1              | 0.4178                        | 46.7        | 53.3 |
| 3           | 46.4              | 0.6244                        | 46.6        | 53.4 |
| 4           | 56.3              | 0.8282                        | 46.7        | 53.3 |
| 8           | 81.3              | 1.6759                        | 46.5        | 53.5 |
| 12          | 92.0              | 2.5268                        | 46.7        | 53.3 |

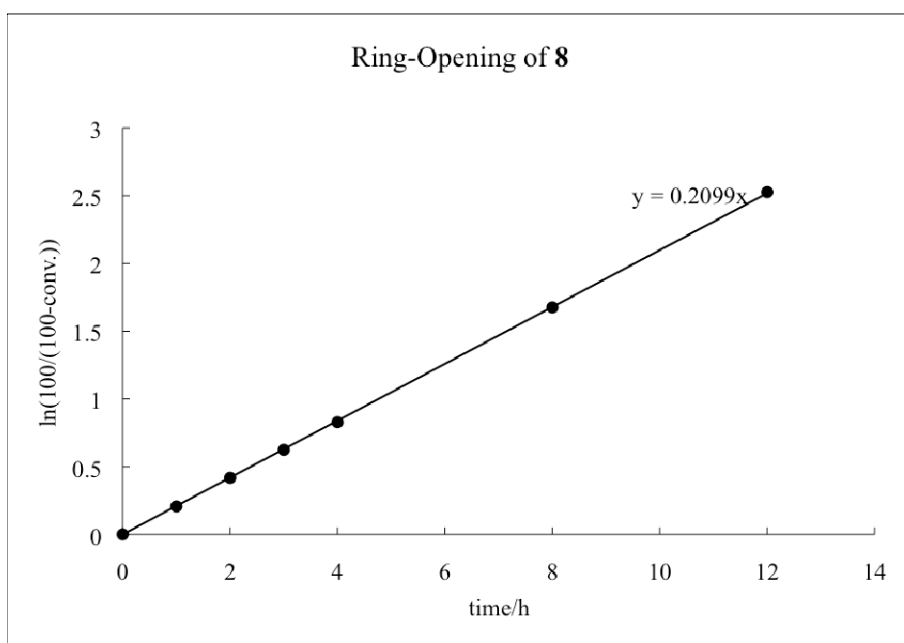

## Ring-Opening Reaction of **9**

| Time<br>(h) | Conversion<br>(%) | $\ln(100/(100-\text{conv.}))$ | Ratio (Z/E) |      |
|-------------|-------------------|-------------------------------|-------------|------|
|             |                   |                               | Z           | E    |
| 0           | 0.0               | 0                             |             |      |
| 0.25        | 11.9              | 0.1268                        | 70.1        | 29.9 |
| 0.5         | 23.3              | 0.2650                        | 70.3        | 29.7 |
| 0.75        | 32.3              | 0.3899                        | 71.0        | 29.0 |
| 1           | 40.4              | 0.5178                        | 71.0        | 29.0 |
| 1.5         | 55.8              | 0.8170                        | 70.7        | 29.3 |
| 2           | 66.7              | 1.1002                        | 70.6        | 29.4 |
| 3           | 81.0              | 1.6613                        | 70.8        | 29.2 |

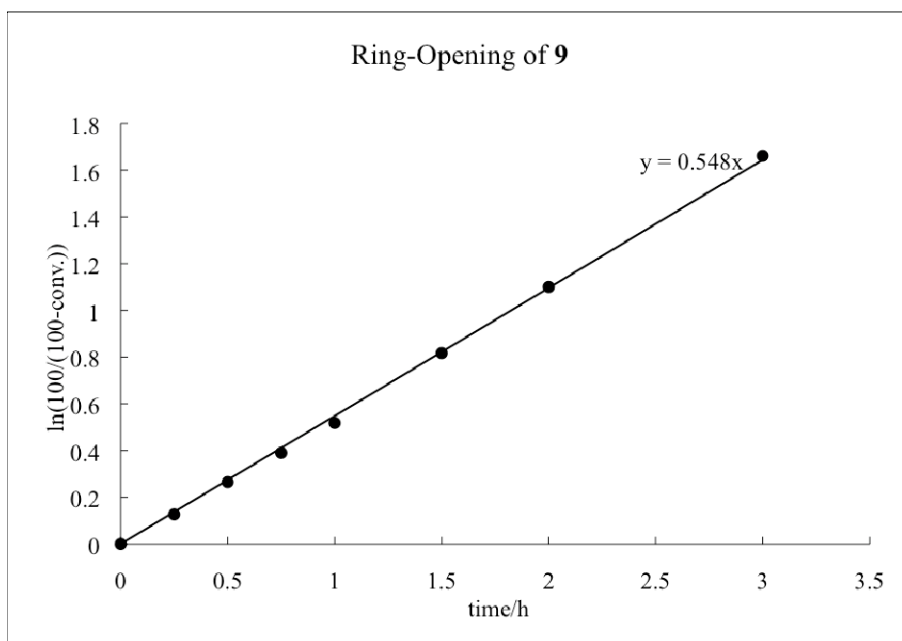

## Optimized Cartesian Coordinates and Energies

### Ring-Opening Reaction of **17**

#### Cyclobutene

| Center<br>Number | Atomic<br>Number | Atomic<br>Type | Coordinates (Angstroms) |           |           |
|------------------|------------------|----------------|-------------------------|-----------|-----------|
|                  |                  |                | X                       | Y         | Z         |
| 1                | 6                | 0              | -1.891428               | 1.054643  | -0.184207 |
| 2                | 6                | 0              | -2.712669               | -0.150354 | 0.230273  |
| 3                | 6                | 0              | -1.843473               | -1.03887  | -0.264971 |
| 4                | 6                | 0              | -0.842357               | 0.005532  | -0.740348 |
| 5                | 14               | 0              | 0.902997                | -0.002697 | 0.015594  |
| 6                | 6                | 0              | 1.819165                | 1.555629  | -0.540799 |
| 7                | 6                | 0              | 1.825558                | -1.53301  | -0.604812 |
| 8                | 6                | 0              | 0.809864                | -0.050025 | 1.902604  |
| 9                | 1                | 0              | -1.540569               | 1.699679  | 0.62784   |
| 10               | 1                | 0              | -2.338388               | 1.686085  | -0.958006 |
| 11               | 1                | 0              | -3.661255               | -0.240528 | 0.747155  |
| 12               | 1                | 0              | -1.834149               | -2.122631 | -0.312338 |
| 13               | 1                | 0              | -0.744377               | 0.052798  | -1.833481 |
| 14               | 1                | 0              | 1.906222                | 1.598432  | -1.630828 |
| 15               | 1                | 0              | 2.832081                | 1.587634  | -0.127394 |
| 16               | 1                | 0              | 1.30122                 | 2.462483  | -0.214308 |
| 17               | 1                | 0              | 2.842135                | -1.572964 | -0.201154 |
| 18               | 1                | 0              | 1.903855                | -1.537542 | -1.696347 |
| 19               | 1                | 0              | 1.316597                | -2.454247 | -0.305297 |
| 20               | 1                | 0              | 1.814083                | -0.079038 | 2.336966  |
| 21               | 1                | 0              | 0.269818                | -0.93365  | 2.253816  |
| 22               | 1                | 0              | 0.302805                | 0.829984  | 2.30862   |

Sum of electronic and zero-point Energies = -564.565175

Sum of electronic and thermal Energies = -564.553653

Z-butadiene

| Center<br>Number | Atomic<br>Number | Atomic<br>Type | Coordinates (Angstroms) |           |           |
|------------------|------------------|----------------|-------------------------|-----------|-----------|
|                  |                  |                | X                       | Y         | Z         |
| 1                | 6                | 0              | 2.583205                | -0.999657 | -0.195858 |
| 2                | 6                | 0              | 2.577973                | 0.261671  | 0.240057  |
| 3                | 6                | 0              | 1.671321                | 1.3271    | -0.208087 |
| 4                | 6                | 0              | 0.338995                | 1.275762  | -0.381267 |
| 5                | 14               | 0              | -0.959722               | -0.039884 | 0.015027  |
| 6                | 6                | 0              | -1.211422               | -1.219658 | -1.443708 |
| 7                | 6                | 0              | -2.569857               | 0.918001  | 0.282259  |
| 8                | 6                | 0              | -0.576235               | -1.016895 | 1.584092  |
| 9                | 1                | 0              | 3.301253                | -1.722077 | 0.175333  |
| 10               | 1                | 0              | 1.88889                 | -1.341234 | -0.954979 |
| 11               | 1                | 0              | 3.346832                | 0.569033  | 0.948011  |
| 12               | 1                | 0              | 2.176176                | 2.275644  | -0.401143 |
| 13               | 1                | 0              | -0.100269               | 2.201431  | -0.759534 |
| 14               | 1                | 0              | -1.409097               | -0.669526 | -2.368438 |
| 15               | 1                | 0              | -2.065819               | -1.879474 | -1.260698 |
| 16               | 1                | 0              | -0.336082               | -1.851625 | -1.615291 |
| 17               | 1                | 0              | -3.400038               | 0.239065  | 0.500107  |
| 18               | 1                | 0              | -2.842882               | 1.498287  | -0.604762 |
| 19               | 1                | 0              | -2.483683               | 1.615499  | 1.120949  |
| 20               | 1                | 0              | -1.417946               | -1.673372 | 1.828029  |
| 21               | 1                | 0              | -0.42169                | -0.345063 | 2.43334   |
| 22               | 1                | 0              | 0.31658                 | -1.636166 | 1.483763  |

Sum of electronic and zero-point Energies = -564.581953

Sum of electronic and thermal Energies = -564.569728

*E*-butadiene

| Center<br>Number | Atomic<br>Number | Atomic<br>Type | Coordinates (Angstroms) |           |           |
|------------------|------------------|----------------|-------------------------|-----------|-----------|
|                  |                  |                | X                       | Y         | Z         |
| 1                | 6                | 0              | -3.707362               | -0.690381 | -0.0514   |
| 2                | 6                | 0              | -3.03878                | 0.455596  | 0.101818  |
| 3                | 6                | 0              | -1.585808               | 0.634445  | -0.033307 |
| 4                | 6                | 0              | -0.639625               | -0.288677 | 0.209346  |
| 5                | 14               | 0              | 1.211666                | -0.047002 | 0.004797  |
| 6                | 6                | 0              | 2.060564                | -0.348255 | 1.667394  |
| 7                | 6                | 0              | 1.581937                | 1.705666  | -0.593295 |
| 8                | 6                | 0              | 1.859286                | -1.3029   | -1.252576 |
| 9                | 1                | 0              | -3.205257               | -1.612907 | -0.323383 |
| 10               | 1                | 0              | -4.782374               | -0.736912 | 0.076974  |
| 11               | 1                | 0              | -3.603901               | 1.359772  | 0.320555  |
| 12               | 1                | 0              | -1.280934               | 1.633348  | -0.343846 |
| 13               | 1                | 0              | -0.980819               | -1.261615 | 0.569803  |
| 14               | 1                | 0              | 1.719605                | 0.366939  | 2.421449  |
| 15               | 1                | 0              | 3.147106                | -0.249673 | 1.578671  |
| 16               | 1                | 0              | 1.849946                | -1.35331  | 2.04563   |
| 17               | 1                | 0              | 2.660401                | 1.847534  | -0.713923 |
| 18               | 1                | 0              | 1.230015                | 2.458769  | 0.11783   |
| 19               | 1                | 0              | 1.113819                | 1.911433  | -1.560284 |
| 20               | 1                | 0              | 2.94314                 | -1.212402 | -1.376315 |
| 21               | 1                | 0              | 1.396681                | -1.157246 | -2.232901 |
| 22               | 1                | 0              | 1.647977                | -2.328664 | -0.935303 |

Sum of electronic and zero-point Energies = -564.587913

Sum of electronic and thermal Energies = -564.575570



Inward TS

| Center<br>Number | Atomic<br>Number | Atomic<br>Type | Coordinates (Angstroms) |           |           |
|------------------|------------------|----------------|-------------------------|-----------|-----------|
|                  |                  |                | X                       | Y         | Z         |
| 1                | 6                | 0              | -1.961822               | 1.064421  | -0.273298 |
| 2                | 6                | 0              | -2.481929               | -0.113509 | 0.341771  |
| 3                | 6                | 0              | -1.846671               | -1.148423 | -0.294694 |
| 4                | 6                | 0              | -0.677387               | -0.582633 | -0.898326 |
| 5                | 14               | 0              | 0.85911                 | 0.005971  | 0.021129  |
| 6                | 6                | 0              | 1.601984                | 1.506943  | -0.855837 |
| 7                | 6                | 0              | 2.119349                | -1.408999 | -0.079809 |
| 8                | 6                | 0              | 0.543164                | 0.386427  | 1.841582  |
| 9                | 1                | 0              | -1.820999               | 2.001274  | 0.270263  |
| 10               | 1                | 0              | -2.101998               | 1.198037  | -1.337365 |
| 11               | 1                | 0              | -3.180214               | -0.141134 | 1.172917  |
| 12               | 1                | 0              | -2.187183               | -2.17226  | -0.427034 |
| 13               | 1                | 0              | -0.423581               | -0.922578 | -1.915538 |
| 14               | 1                | 0              | 1.765917                | 1.304812  | -1.919052 |
| 15               | 1                | 0              | 2.56961                 | 1.777156  | -0.42124  |
| 16               | 1                | 0              | 0.945828                | 2.378698  | -0.78232  |
| 17               | 1                | 0              | 3.068733                | -1.127646 | 0.387598  |
| 18               | 1                | 0              | 2.332364                | -1.682775 | -1.117953 |
| 19               | 1                | 0              | 1.751069                | -2.304996 | 0.429172  |
| 20               | 1                | 0              | 1.500576                | 0.510368  | 2.358033  |
| 21               | 1                | 0              | 0.005429                | -0.43008  | 2.330513  |
| 22               | 1                | 0              | -0.033218               | 1.302174  | 1.987863  |

Sum of electronic and zero-point Energies = -564.517578

Sum of electronic and thermal Energies = -564.506348

Outward TS

| Center<br>Number | Atomic<br>Number | Atomic<br>Type | Coordinates (Angstroms) |           |           |
|------------------|------------------|----------------|-------------------------|-----------|-----------|
|                  |                  |                | X                       | Y         | Z         |
| 1                | 6                | 0              | 2.531136                | -1.026745 | 0.033262  |
| 2                | 6                | 0              | 2.925012                | 0.347565  | -0.011099 |
| 3                | 6                | 0              | 1.747658                | 1.035166  | -0.11925  |
| 4                | 6                | 0              | 0.779093                | 0.067752  | -0.570594 |
| 5                | 14               | 0              | -1.026664               | -0.02382  | -0.012376 |
| 6                | 6                | 0              | -2.06089                | -0.83878  | -1.367192 |
| 7                | 6                | 0              | -1.655209               | 1.729066  | 0.324962  |
| 8                | 6                | 0              | -1.160847               | -1.041403 | 1.57694   |
| 9                | 1                | 0              | 1.923603                | -1.364146 | 0.861268  |
| 10               | 1                | 0              | 3.108816                | -1.822707 | -0.442502 |
| 11               | 1                | 0              | 3.945743                | 0.719121  | -0.039543 |
| 12               | 1                | 0              | 1.533447                | 2.064542  | 0.155524  |
| 13               | 1                | 0              | 1.003575                | -0.385163 | -1.531321 |
| 14               | 1                | 0              | -2.035615               | -0.254725 | -2.292039 |
| 15               | 1                | 0              | -3.107968               | -0.937526 | -1.064754 |
| 16               | 1                | 0              | -1.689054               | -1.841879 | -1.598348 |
| 17               | 1                | 0              | -2.697007               | 1.707447  | 0.660125  |
| 18               | 1                | 0              | -1.607039               | 2.351207  | -0.573247 |
| 19               | 1                | 0              | -1.069483               | 2.222701  | 1.105951  |
| 20               | 1                | 0              | -2.194079               | -1.074244 | 1.937081  |
| 21               | 1                | 0              | -0.545009               | -0.613973 | 2.374022  |
| 22               | 1                | 0              | -0.832344               | -2.072901 | 1.418868  |

Sum of electronic and zero-point Energies = -564.516079

Sum of electronic and thermal Energies = -564.504589

## Ring-Opening Reaction of 18

### Cyclobutene

| Center<br>Number | Atomic<br>Number | Atomic<br>Type | Coordinates (Angstroms) |           |           |
|------------------|------------------|----------------|-------------------------|-----------|-----------|
|                  |                  |                | X                       | Y         | Z         |
| 1                | 6                | 0              | 2.128852                | -1.054952 | -0.195011 |
| 2                | 6                | 0              | 2.941063                | 0.15139   | 0.235962  |
| 3                | 6                | 0              | 2.078851                | 1.038276  | -0.276391 |
| 4                | 6                | 0              | 1.09616                 | -0.006773 | -0.772009 |
| 5                | 32               | 0              | -0.733069               | 0.001795  | 0.011036  |
| 6                | 6                | 0              | -1.711743               | -1.600578 | -0.60979  |
| 7                | 6                | 0              | -1.68276                | 1.627023  | -0.595309 |
| 8                | 6                | 0              | -0.629738               | -0.00048  | 1.984047  |
| 9                | 1                | 0              | 1.758779                | -1.696531 | 0.611258  |
| 10               | 1                | 0              | 2.593337                | -1.689561 | -0.956048 |
| 11               | 1                | 0              | 3.878695                | 0.243336  | 0.772146  |
| 12               | 1                | 0              | 2.06683                 | 2.122023  | -0.323252 |
| 13               | 1                | 0              | 0.996187                | -0.053293 | -1.862867 |
| 14               | 1                | 0              | -1.797125               | -1.602884 | -1.699015 |
| 15               | 1                | 0              | -2.719485               | -1.621296 | -0.187869 |
| 16               | 1                | 0              | -1.19452                | -2.513024 | -0.304249 |
| 17               | 1                | 0              | -2.696221               | 1.652707  | -0.187552 |
| 18               | 1                | 0              | -1.752512               | 1.651027  | -1.685413 |
| 19               | 1                | 0              | -1.159368               | 2.527233  | -0.264866 |
| 20               | 1                | 0              | -1.630955               | 0.089975  | 2.412108  |
| 21               | 1                | 0              | -0.025033               | 0.836087  | 2.339805  |
| 22               | 1                | 0              | -0.184512               | -0.926677 | 2.353662  |

Sum of electronic and zero-point Energies = -2352.039226

Sum of electronic and thermal Energies = -2352.027019

Z-butadiene

| Center<br>Number | Atomic<br>Number | Atomic<br>Type | Coordinates (Angstroms) |           |           |
|------------------|------------------|----------------|-------------------------|-----------|-----------|
|                  |                  |                | X                       | Y         | Z         |
| 1                | 6                | 0              | 2.759462                | -1.01635  | -0.200301 |
| 2                | 6                | 0              | 2.797874                | 0.244722  | 0.234709  |
| 3                | 6                | 0              | 1.930553                | 1.34165   | -0.216079 |
| 4                | 6                | 0              | 0.600985                | 1.333266  | -0.396956 |
| 5                | 32               | 0              | -0.766744               | -0.02766  | 0.012016  |
| 6                | 6                | 0              | -1.009536               | -1.299231 | -1.483883 |
| 7                | 6                | 0              | -2.447616               | 0.992527  | 0.225015  |
| 8                | 6                | 0              | -0.4043                 | -1.00413  | 1.687764  |
| 9                | 1                | 0              | 3.447663                | -1.764364 | 0.176642  |
| 10               | 1                | 0              | 2.058958                | -1.332419 | -0.964701 |
| 11               | 1                | 0              | 3.571697                | 0.523982  | 0.948797  |
| 12               | 1                | 0              | 2.464426                | 2.276097  | -0.40107  |
| 13               | 1                | 0              | 0.172556                | 2.264759  | -0.767746 |
| 14               | 1                | 0              | -1.141567               | -0.762993 | -2.42612  |
| 15               | 1                | 0              | -1.897209               | -1.912617 | -1.309524 |
| 16               | 1                | 0              | -0.148968               | -1.963434 | -1.583353 |
| 17               | 1                | 0              | -3.281064               | 0.317759  | 0.434498  |
| 18               | 1                | 0              | -2.681065               | 1.550025  | -0.6855   |
| 19               | 1                | 0              | -2.365788               | 1.702901  | 1.050987  |
| 20               | 1                | 0              | -1.266241               | -1.627414 | 1.938991  |
| 21               | 1                | 0              | -0.236822               | -0.299848 | 2.505244  |
| 22               | 1                | 0              | 0.474701                | -1.642033 | 1.596731  |

Sum of electronic and zero-point Energies = -2352.055591

Sum of electronic and thermal Energies = -2352.042709

*E*-butadiene

| Center<br>Number | Atomic<br>Number | Atomic<br>Type | Coordinates (Angstroms) |           |           |
|------------------|------------------|----------------|-------------------------|-----------|-----------|
|                  |                  |                | X                       | Y         | Z         |
| 1                | 6                | 0              | -4.013503               | -0.692729 | -0.050466 |
| 2                | 6                | 0              | -3.340376               | 0.450046  | 0.105625  |
| 3                | 6                | 0              | -1.886033               | 0.623365  | -0.029813 |
| 4                | 6                | 0              | -0.947738               | -0.300185 | 0.228275  |
| 5                | 32               | 0              | 0.981221                | -0.034329 | 0.003743  |
| 6                | 6                | 0              | 1.88016                 | -0.299731 | 1.743492  |
| 7                | 6                | 0              | 1.33228                 | 1.79016   | -0.662361 |
| 8                | 6                | 0              | 1.669138                | -1.364664 | -1.286273 |
| 9                | 1                | 0              | -3.514809               | -1.615993 | -0.326258 |
| 10               | 1                | 0              | -5.088443               | -0.735859 | 0.079822  |
| 11               | 1                | 0              | -3.901388               | 1.355972  | 0.328171  |
| 12               | 1                | 0              | -1.576212               | 1.616698  | -0.353062 |
| 13               | 1                | 0              | -1.278299               | -1.269814 | 0.602028  |
| 14               | 1                | 0              | 1.528134                | 0.433613  | 2.472014  |
| 15               | 1                | 0              | 2.961896                | -0.189861 | 1.635115  |
| 16               | 1                | 0              | 1.674847                | -1.298674 | 2.135322  |
| 17               | 1                | 0              | 2.407271                | 1.940071  | -0.787248 |
| 18               | 1                | 0              | 0.963387                | 2.540979  | 0.03995   |
| 19               | 1                | 0              | 0.850885                | 1.952377  | -1.629157 |
| 20               | 1                | 0              | 2.748861                | -1.252    | -1.410762 |
| 21               | 1                | 0              | 1.192148                | -1.236433 | -2.26017  |
| 22               | 1                | 0              | 1.469089                | -2.380106 | -0.936427 |

Sum of electronic and zero-point Energies = -2352.060664

Sum of electronic and thermal Energies = -2352.047612

Inward TS

| Center<br>Number | Atomic<br>Number | Atomic<br>Type | Coordinates (Angstroms) |           |           |
|------------------|------------------|----------------|-------------------------|-----------|-----------|
|                  |                  |                | X                       | Y         | Z         |
| 1                | 6                | 0              | -2.185214               | 1.062611  | -0.2798   |
| 2                | 6                | 0              | -2.6921                 | -0.115538 | 0.343552  |
| 3                | 6                | 0              | -2.073702               | -1.149681 | -0.313616 |
| 4                | 6                | 0              | -0.918405               | -0.584996 | -0.938261 |
| 5                | 32               | 0              | 0.702504                | 0.005512  | 0.018558  |
| 6                | 6                | 0              | 1.474014                | 1.585205  | -0.882361 |
| 7                | 6                | 0              | 2.007595                | -1.481938 | -0.115803 |
| 8                | 6                | 0              | 0.355005                | 0.378024  | 1.922096  |
| 9                | 1                | 0              | -2.026799               | 1.997081  | 0.263542  |
| 10               | 1                | 0              | -2.348603               | 1.200086  | -1.339984 |
| 11               | 1                | 0              | -3.366948               | -0.145163 | 1.193845  |
| 12               | 1                | 0              | -2.423572               | -2.170165 | -0.45035  |
| 13               | 1                | 0              | -0.668414               | -0.923633 | -1.954982 |
| 14               | 1                | 0              | 1.639549                | 1.380771  | -1.942926 |
| 15               | 1                | 0              | 2.434175                | 1.85123   | -0.433407 |
| 16               | 1                | 0              | 0.80211                 | 2.441888  | -0.79861  |
| 17               | 1                | 0              | 2.958071                | -1.200461 | 0.344905  |
| 18               | 1                | 0              | 2.197477                | -1.737141 | -1.161268 |
| 19               | 1                | 0              | 1.628433                | -2.372022 | 0.39158   |
| 20               | 1                | 0              | 1.307644                | 0.458501  | 2.451582  |
| 21               | 1                | 0              | -0.22336                | -0.430988 | 2.371586  |
| 22               | 1                | 0              | -0.193048               | 1.311504  | 2.055789  |

Sum of electronic and zero-point Energies = -2351.989711

Sum of electronic and thermal Energies = -2351.977723

Outward TS

| Center<br>Number | Atomic<br>Number | Atomic<br>Type | Coordinates (Angstroms) |           |           |
|------------------|------------------|----------------|-------------------------|-----------|-----------|
|                  |                  |                | X                       | Y         | Z         |
| 1                | 6                | 0              | 2.80681                 | -1.02722  | 0.037788  |
| 2                | 6                | 0              | 3.194964                | 0.347179  | -0.013379 |
| 3                | 6                | 0              | 2.01337                 | 1.030299  | -0.124357 |
| 4                | 6                | 0              | 1.058279                | 0.056695  | -0.576091 |
| 5                | 32               | 0              | -0.833797               | -0.017375 | -0.009777 |
| 6                | 6                | 0              | -1.922678               | -0.809542 | -1.455123 |
| 7                | 6                | 0              | -1.4586                 | 1.816274  | 0.391802  |
| 8                | 6                | 0              | -1.008171               | -1.12183  | 1.621032  |
| 9                | 1                | 0              | 2.197379                | -1.361977 | 0.865601  |
| 10               | 1                | 0              | 3.39076                 | -1.823624 | -0.429478 |
| 11               | 1                | 0              | 4.213841                | 0.723462  | -0.048444 |
| 12               | 1                | 0              | 1.790375                | 2.056989  | 0.153426  |
| 13               | 1                | 0              | 1.268955                | -0.398688 | -1.537254 |
| 14               | 1                | 0              | -1.873077               | -0.194603 | -2.356573 |
| 15               | 1                | 0              | -2.968844               | -0.889857 | -1.150482 |
| 16               | 1                | 0              | -1.561437               | -1.810821 | -1.701784 |
| 17               | 1                | 0              | -2.5003                 | 1.79299   | 0.720721  |
| 18               | 1                | 0              | -1.390222               | 2.451741  | -0.493565 |
| 19               | 1                | 0              | -0.859983               | 2.265184  | 1.187499  |
| 20               | 1                | 0              | -2.046146               | -1.136682 | 1.962386  |
| 21               | 1                | 0              | -0.387705               | -0.719061 | 2.424858  |
| 22               | 1                | 0              | -0.695929               | -2.15017  | 1.425914  |

Sum of electronic and zero-point Energies = -2351.989849

Sum of electronic and thermal Energies = -2351.977661

## Ring-Opening Reaction of 19

### Cyclobutene

| Center<br>Number | Atomic<br>Number | Atomic<br>Type | Coordinates (Angstroms) |           |           |
|------------------|------------------|----------------|-------------------------|-----------|-----------|
|                  |                  |                | X                       | Y         | Z         |
| 1                | 6                | 0              | 2.392193                | -1.056528 | -0.210489 |
| 2                | 6                | 0              | 3.196915                | 0.151927  | 0.247858  |
| 3                | 6                | 0              | 2.338288                | 1.045287  | -0.292985 |
| 4                | 6                | 0              | 1.366005                | -0.005708 | -0.811177 |
| 5                | 50               | 0              | -0.641295               | 0.001412  | 0.008488  |
| 6                | 6                | 0              | -1.717028               | -1.711081 | -0.732478 |
| 7                | 6                | 0              | -1.649017               | 1.801921  | -0.60733  |
| 8                | 6                | 0              | -0.547248               | -0.071526 | 2.156374  |
| 9                | 1                | 0              | 2.007157                | -1.70788  | 0.588997  |
| 10               | 1                | 0              | 2.879474                | -1.687326 | -0.968299 |
| 11               | 1                | 0              | 4.120054                | 0.243851  | 0.820679  |
| 12               | 1                | 0              | 2.326056                | 2.135521  | -0.339704 |
| 13               | 1                | 0              | 1.293519                | -0.051607 | -1.910231 |
| 14               | 1                | 0              | -1.78732                | -1.685976 | -1.828649 |
| 15               | 1                | 0              | -2.737975               | -1.734273 | -0.326721 |
| 16               | 1                | 0              | -1.215561               | -2.645058 | -0.444187 |
| 17               | 1                | 0              | -2.671184               | 1.832665  | -0.205231 |
| 18               | 1                | 0              | -1.712995               | 1.862336  | -1.702519 |
| 19               | 1                | 0              | -1.115914               | 2.692465  | -0.24717  |
| 20               | 1                | 0              | -1.556797               | -0.007252 | 2.585566  |
| 21               | 1                | 0              | 0.045931                | 0.764161  | 2.550874  |
| 22               | 1                | 0              | -0.090318               | -1.007968 | 2.503557  |

Sum of electronic and zero-point Energies= -278.351606

Sum of electronic and thermal Energies= -278.338457



Z-butadiene

| Center<br>Number | Atomic<br>Number | Atomic<br>Type | Coordinates (Angstroms) |           |           |
|------------------|------------------|----------------|-------------------------|-----------|-----------|
|                  |                  |                | X                       | Y         | Z         |
| 1                | 6                | 0              | 2.882183                | -1.051564 | -0.209236 |
| 2                | 6                | 0              | 3.01255                 | 0.217525  | 0.223303  |
| 3                | 6                | 0              | 2.213377                | 1.371452  | -0.238309 |
| 4                | 6                | 0              | 0.873614                | 1.419652  | -0.435435 |
| 5                | 50               | 0              | -0.655403               | -0.019054 | 0.013013  |
| 6                | 6                | 0              | -0.380395               | -0.882568 | 1.960795  |
| 7                | 6                | 0              | -0.796666               | -1.569981 | -1.475144 |
| 8                | 6                | 0              | -2.48342                | 1.114685  | -0.023305 |
| 9                | 1                | 0              | 3.51427                 | -1.850542 | 0.178759  |
| 10               | 1                | 0              | 2.165881                | -1.321904 | -0.984419 |
| 11               | 1                | 0              | 3.805523                | 0.445156  | 0.943192  |
| 12               | 1                | 0              | 2.801691                | 2.282582  | -0.408728 |
| 13               | 1                | 0              | 0.492583                | 2.379431  | -0.806735 |
| 14               | 1                | 0              | 0.536368                | -1.483628 | 2.000075  |
| 15               | 1                | 0              | -1.231897               | -1.529731 | 2.212876  |
| 16               | 1                | 0              | -0.309178               | -0.095453 | 2.723387  |
| 17               | 1                | 0              | -1.776568               | -2.064015 | -1.416374 |
| 18               | 1                | 0              | -0.02174                | -2.33407  | -1.329659 |
| 19               | 1                | 0              | -0.684516               | -1.153996 | -2.485556 |
| 20               | 1                | 0              | -3.346285               | 0.477094  | 0.213576  |
| 21               | 1                | 0              | -2.649888               | 1.553973  | -1.016857 |
| 22               | 1                | 0              | -2.453547               | 1.932588  | 0.709804  |

Sum of electronic and zero-point Energies= -278.366886

Sum of electronic and thermal Energies= -278.353175

*E*-butadiene

| Center<br>Number | Atomic<br>Number | Atomic<br>Type | Coordinates (Angstroms) |           |           |
|------------------|------------------|----------------|-------------------------|-----------|-----------|
|                  |                  |                | X                       | Y         | Z         |
| 1                | 6                | 0              | -4.329975               | -0.716143 | -0.043127 |
| 2                | 6                | 0              | -3.652388               | 0.43954   | 0.104226  |
| 3                | 6                | 0              | -2.187516               | 0.607908  | -0.017656 |
| 4                | 6                | 0              | -1.247515               | -0.335025 | 0.233071  |
| 5                | 50               | 0              | 0.852846                | -0.025837 | 0.001883  |
| 6                | 6                | 0              | 1.832174                | -0.328538 | 1.892975  |
| 7                | 6                | 0              | 1.170402                | 1.983244  | -0.692282 |
| 8                | 6                | 0              | 1.626577                | -1.442498 | -1.420355 |
| 9                | 1                | 0              | -3.826104               | -1.649433 | -0.296585 |
| 10               | 1                | 0              | -5.412852               | -0.755649 | 0.072444  |
| 11               | 1                | 0              | -4.218853               | 1.354186  | 0.304043  |
| 12               | 1                | 0              | -1.87412                | 1.612187  | -0.322882 |
| 13               | 1                | 0              | -1.604699               | -1.309988 | 0.586789  |
| 14               | 1                | 0              | 1.641194                | -1.341938 | 2.271992  |
| 15               | 1                | 0              | 1.467906                | 0.389274  | 2.640126  |
| 16               | 1                | 0              | 2.919049                | -0.2013   | 1.794483  |
| 17               | 1                | 0              | 2.243533                | 2.181785  | -0.81849  |
| 18               | 1                | 0              | 0.772377                | 2.715069  | 0.023761  |
| 19               | 1                | 0              | 0.678959                | 2.1472    | -1.660808 |
| 20               | 1                | 0              | 2.71105                 | -1.317264 | -1.544576 |
| 21               | 1                | 0              | 1.150261                | -1.311539 | -2.401247 |
| 22               | 1                | 0              | 1.439447                | -2.471684 | -1.084322 |

Sum of electronic and zero-point Energies= -278.370582

Sum of electronic and thermal Energies= -278.356702

Inward TS

| Center<br>Number | Atomic<br>Number | Atomic<br>Type | Coordinates (Angstroms) |           |           |
|------------------|------------------|----------------|-------------------------|-----------|-----------|
|                  |                  |                | X                       | Y         | Z         |
| 1                | 6                | 0              | -2.365873               | 1.071203  | -0.276343 |
| 2                | 6                | 0              | -2.907938               | -0.106184 | 0.341049  |
| 3                | 6                | 0              | -2.337495               | -1.152847 | -0.361934 |
| 4                | 6                | 0              | -1.173199               | -0.610348 | -1.010233 |
| 5                | 50               | 0              | 0.611002                | 0.001363  | 0.017893  |
| 6                | 6                | 0              | 1.425506                | 1.752535  | -0.928651 |
| 7                | 6                | 0              | 2.040844                | -1.601616 | -0.185922 |
| 8                | 6                | 0              | 0.212706                | 0.344572  | 2.097488  |
| 9                | 1                | 0              | -2.157468               | 1.992544  | 0.285423  |
| 10               | 1                | 0              | -2.55821                | 1.241416  | -1.332926 |
| 11               | 1                | 0              | -3.558958               | -0.129645 | 1.216782  |
| 12               | 1                | 0              | -2.729256               | -2.162227 | -0.514909 |
| 13               | 1                | 0              | -0.975732               | -0.936009 | -2.050001 |
| 14               | 1                | 0              | 1.580716                | 1.577138  | -2.002249 |
| 15               | 1                | 0              | 2.394823                | 2.020984  | -0.485992 |
| 16               | 1                | 0              | 0.747551                | 2.609294  | -0.817311 |
| 17               | 1                | 0              | 2.995818                | -1.334892 | 0.28861   |
| 18               | 1                | 0              | 2.237574                | -1.818134 | -1.245183 |
| 19               | 1                | 0              | 1.66871                 | -2.520842 | 0.286807  |
| 20               | 1                | 0              | 1.156473                | 0.377667  | 2.659294  |
| 21               | 1                | 0              | -0.40551                | -0.463561 | 2.509346  |
| 22               | 1                | 0              | -0.313965               | 1.294242  | 2.254928  |

Sum of electronic and zero-point Energies= -278.303698

Sum of electronic and thermal Energies= -278.290753

Outward TS

| Center<br>Number | Atomic<br>Number | Atomic<br>Type | Coordinates (Angstroms) |           |           |
|------------------|------------------|----------------|-------------------------|-----------|-----------|
|                  |                  |                | X                       | Y         | Z         |
| 1                | 6                | 0              | 3.088045                | -1.036462 | 0.046155  |
| 2                | 6                | 0              | 3.493469                | 0.341321  | -0.014147 |
| 3                | 6                | 0              | 2.306752                | 1.035894  | -0.140999 |
| 4                | 6                | 0              | 1.343405                | 0.057846  | -0.593563 |
| 5                | 50               | 0              | -0.729919               | -0.011996 | -0.007299 |
| 6                | 6                | 0              | -1.874236               | -0.952569 | -1.56674  |
| 7                | 6                | 0              | -1.424808               | 1.996773  | 0.33748   |
| 8                | 6                | 0              | -0.933703               | -1.144996 | 1.811424  |
| 9                | 1                | 0              | 2.463507                | -1.359806 | 0.874896  |
| 10               | 1                | 0              | 3.670351                | -1.84698  | -0.412798 |
| 11               | 1                | 0              | 4.521812                | 0.70962   | -0.045585 |
| 12               | 1                | 0              | 2.086854                | 2.068601  | 0.1411    |
| 13               | 1                | 0              | 1.577931                | -0.41125  | -1.549879 |
| 14               | 1                | 0              | -1.811866               | -0.377079 | -2.50033  |
| 15               | 1                | 0              | -2.932925               | -1.030916 | -1.283623 |
| 16               | 1                | 0              | -1.500115               | -1.966513 | -1.764789 |
| 17               | 1                | 0              | -2.475017               | 1.989011  | 0.660339  |
| 18               | 1                | 0              | -1.35131                | 2.600057  | -0.577241 |
| 19               | 1                | 0              | -0.832487               | 2.487899  | 1.121439  |
| 20               | 1                | 0              | -1.979433               | -1.154424 | 2.148588  |
| 21               | 1                | 0              | -0.320979               | -0.709955 | 2.612779  |
| 22               | 1                | 0              | -0.61391                | -2.185332 | 1.662397  |

Sum of electronic and zero-point Energies= -278.302653

Sum of electronic and thermal Energies= -278.289562
